# Supplementary material for: Silicon cycle in the Tropical South Pacific: evidence for an active pico-sized siliceous plankton
Source: Copernicus journal article supplement (doi:10.5194/bg-2018-149), 2018-05-15
Supplement: Supplementary file [file bg-2018-149-AC4-supplement.zip]

# Silicon cycle in the Tropical South Pacific: contribution to the global Si cycle and evidence for an active pico-sized siliceous plankton

Karine Leblanc<sup>1</sup>, Véronique Cornet<sup>1</sup>, Peggy Rimmelin-Maury<sup>2</sup>, Olivier Grosso<sup>1</sup>, Sandra Hélias-Nunige<sup>1</sup>, Camille Brunet<sup>1</sup>, Hervé Claustre<sup>3</sup>, Joséphine Ras<sup>3</sup>, Nathalie Leblond<sup>3</sup>, Bernard Quéguiner<sup>1</sup>

<sup>1</sup>Aix-Marseille Univ., Université de Toulon, CNRS, IRD, MIO, UM110, Marseille, F-13288, France

<sup>2</sup>UMR 6539 LEMAR and UMS OSU IUEM - UBO, Université Européenne de Bretagne, Brest, France

<sup>3</sup>UPMC Univ Paris 06, UMR 7093, LOV, 06230 Villefranche-sur-mer, France

*Correspondence to:* Karine Leblanc (karine.leblanc@univ-amu.fr)

## 1 Abstract

This article presents data regarding the Si biogeochemical cycle during two oceanographic cruises conducted in the Southern Tropical Pacific (BIOSOPE and OUTPACE cruises) in 2005 and 2015. It involves the first Si stock measurements in this understudied region, encompassing various oceanic systems from New Caledonia to the Chilean upwelling between 8 and 34° S. Some of the lowest levels of biogenic silica standing stocks ever measured were found in this area, notably in the Southern Pacific Gyre, where Chlorophyll a concentrations are most depleted worldwide. Integrated biogenic silica stocks are as low as  $1.08 \pm 0.95 \text{ mmol m}^{-2}$ , and are the lowest stocks measured in the Southern Pacific. Size-fractionated biogenic silica concentrations revealed a non-negligible contribution of the pico-sized fraction ( $<2\text{-}3 \text{ }\mu\text{m}$ ) to biogenic silica standing stocks, representing  $26 \pm 12 \text{ \%}$  of total biogenic silica during the OUTPACE cruise and  $11 \pm 9 \text{ \%}$  during the BIOSOPE cruise. These results indicate significant accumulation in this size-class, which was undocumented for in 2005, but has since then been related to Si uptake by *Synechococcus* cells. Si uptake measurements carried out during BIOSOPE confirmed biological Si uptake by this size-fraction. We further present diatoms community structure associated with the stock measurements for a global overview of the Si cycle in the Southern Tropical Pacific.

## 2 Introduction

Siliceous phytoplankton, especially diatoms, are often associated with nutrient-rich eutrophic ecosystems. However, the global budget of biogenic silica production by Nelson *et al.* (1995) already pointed out the importance of these organisms in oligotrophic areas where, despite their low concentration and due to the geographical extension of these systems, their silica production would be comparable to that of areas overlying major diatomaceous sediment accumulation zones. However, studies that have documented the Si cycle in the Pacific Ocean, the largest oligotrophic area of the World Ocean, mainly focused on the Equatorial region, and the northern Subtropical gyre. This article presents the first set of field results from the Southern Pacific Ocean between 8 and 34° S spanning from New Caledonia over to the Chilean upwelling, and notably, from the most Chlorophyll a-depleted region at a worldwide scale (Ras et al., 2008): the South Pacific Gyre (SPG).

Diatoms are known to contribute more importantly to primary production in meso- to eutrophic systems, yet several studies have emphasized that even if they are not dominant in oligotrophic regions, they may still contribute up to 10-20 % of C primary production in the Equatorial Pacific (Blain et al., 1997). In the oligotrophic Sargasso Sea (BATS station), their contribution was estimated to be as high as 26-48 % of new annual primary production (Brzezinski and Nelson, 1995) and to represent up to 30 % of Particulate Organic Carbon (POC) export, leading to an upward revision of the contribution of oligotrophic gyres to global Si budgets (Nelson and Brzezinski, 1997). Similar studies carried out in the Northern Pacific (HOT station) led to new estimates, as diatoms were found to be less important contributors to primary production. A combination of both Atlantic and North Pacific oligotrophic gyres budgets led to a revised contribution of 13 Tmol Si y<sup>-1</sup>, a 51 % diminution of the previous estimate (Brzezinski et al., 2011).

In the Eastern Equatorial Pacific (EEP), it has been shown that diatoms experience chronic Si-limitation along the Eastern Equatorial divergence in the so-called High Nutrient Low Silicate Low Chlorophyll (HNLSiLC) system (Dugdale and Wilkerson, 1998) as well as Si-Fe co-limitation (Blain et al., 1997; Leynaert et al., 2001). Furthermore, oligotrophic regions are known to experience considerable variability in nutrient injections leading to episodical blooms depending on the occurrence of internal waves (Wilson, 2011), meso-scale eddies (Krause et al., 2010) storms (Krause et al., 2009), or local upwellings or dust deposition events (Wilson, 2003 ; Calil et al., 2011). In nitrogen (N) depleted areas, punctual diatom blooms in the form of Diatom Diazotroph

Associations (DDAs) are also known to occur and to contribute both to new primary production (Dore et al., 2008; Brzezinski et al., 2011) but also to benefit to non-diazotrophic diatoms through secondary N-release (Bonnet et al., 2016; Leblanc et al., 2016).

While biogenic silica was classically associated to the largest size fractions, especially microplankton, a series of recent studies provide evidence for a role for picophytoplankton such as *Synechococcus* in the Si cycle, showing that this ubiquitous lineage is able to take up and accumulate Si (Ohnemus et al., 2016; Krause et al., 2017; Brzezinski et al., 2017). This was evidenced in the field in the Equatorial Pacific, the Sargasso Sea, as well as in culture work, suggesting a widespread diffuse role for this organism, which could be more prominent in oligotrophic environments where diatoms are in low abundance. In the EEP, and despite very variable cellular Si content, *Synechococcus* represented for instance 40 % of water column biogenic silica (BSi) inventory compared to diatoms in 2004, and twice that of diatoms the following year (Baines et al., 2012). The role of small nano-sized diatoms has also probably been overlooked and we recently pointed out their general occurrence at the worldwide scale and their occasional regional importance in diatom blooms (Leblanc *et al.*, 2018).

Here we present the first set of field results from the Southern Pacific Ocean between 8 and 34° S spanning from New Caledonia over to the Chilean upwelling, and notably, from the most depleted Chla region worldwide (Ras *et al.*, 2008), the South Pacific Gyre (SPG). Results were obtained from two cruises carried out a decade apart following longitudinal sections first in the South Eastern Pacific (SEP) between the Marquesas Islands and the Chilean upwelling, crossing the South Pacific Gyre (BIOSCOPE cruise, Oct-Dec 2004) and next in the Southern Western Pacific (SWP) between New Caledonia and Tahiti (OUTPACE cruise, Feb-Apr. 2015). Very similar sampling strategies and analyses were conducted regarding the Si cycle and provide new data in this under sampled region. We detail size-fractionated BSi inventories in the water column, Si export fluxes, associated diatom community structure composition as well Si uptake and kinetic rates in the Southern Pacific. Our key results show some of the lowest BSi stocks ever measured, which may warrant for a new revision of the contribution of oligotrophic areas to the global Si cycle, and confirm recent findings of an active biological uptake of Si in the pico-sized fraction.

**3 Material and methods**

**3.1 Sampling strategy**

Results presented here encompass data from two French oceanographic cruises located in the Southern Pacific Ocean (from 10 to 30° S), covering two transects that employed a common sampling strategy of short and long duration stations. The BIOSOPE (BIogeochemistry and Optics SOuth Pacific Experiment) cruise was undertaken in 2004, while the OUTPACE cruise took place in 2015, both aboard the R/V *L'Atalante*. The BIOSOPE transect was sampled between the Marquesas Islands (141° W, 8° S) and Concepción (Chile) (72° W, 35° S), between October 24<sup>th</sup> and November 12<sup>th</sup> 2004. The OUTPACE transect was sampled between New Caledonia (159° W, 22° S) and Tahiti (160° W, 20° S) between February 18<sup>th</sup> and April 3<sup>rd</sup> 2015 (Fig. 1).

**3.2 Hydrology**

Water sampling and measurements of temperature and salinity were performed using a SeaBird SBE 911plus CTD/Carousel system fitted with an in situ fluorometer and 24 Niskin bottles. More details about the BIOSOPE cruise strategy are given in the Biogeoscience special issue introductory article by Claustre et al., (2008) while the OUTPACE cruise strategy is detailed in Moutin et al. (2017). Euphotic layer depths ( $Z_e$ ) were calculated as described in Raimbault et al. (2008) and Moutin et al. (2018). Sampling depths were adjusted to on deck incubators screen attenuation using measurements from an in situ PAR sensor (LI-COR instrument) mounted on the CTD frame.

**3.3 Inorganic nutrients**

Nutrients were collected in 20 mL PE vials and analyzed directly on a SEAL Analytical auto-analyzer following Aminot and K  rouel (2007) on board during BIOSOPE and at the laboratory during OUTPACE from frozen (-20  C) samples. During BIOSOPE, nitrate ( $\text{NO}_3^-$ ) detection limit was 0.05  $\mu\text{M}$  (accuracy of  $\pm 0.05 \mu\text{M}$ ), phosphate ( $\text{PO}_4^{3-}$ ) detection limit was 0.02  $\mu\text{M}$  (accuracy of  $\pm 0.05 \mu\text{M}$ ), orthosilicic acid ( $\text{Si(OH)}_4$ ) detection limit was 0.05  $\mu\text{M}$  (accuracy of  $\pm 0.05 \mu\text{M}$ ). During OUTPACE the quantification limit was 0.05  $\mu\text{M}$  for all nutrients.

### 3.4 Particulate Organic Carbon (POC)

Seawater samples (~2 L) were filtered through pre-combusted (for 4h at 450°C) 25 mm GF/F filters, dried at 60 °C and stored in 1.5 mL eppendorfs PE tubes. Particulate Organic Carbon (POC) was analyzed on a CHN elemental analyzer (combustion tempertaure at 925°C) (Perkin Elmer, 2400 series).

### 3.5 Total Chlorophyll *a* (TChl*a*)

For pigment analyses, 2 L of seawater were filtered through 25 mm GF/F filters and stored in liquid nitrogen and -80°C until processing. Extraction was done in 3 mL 100% methanol, followed by sonication and clarification by filtration on a new GF/F filter. Extracted pigments (Chl*a* and fucoxanthin) were then analyzed by HPLC (High Performance Liquid Chromatography) according to the procedure detailed in Ras et al. (2008).

### 3.6 Particulate Biogenic and Lithogenic Silica (BSi/LSi)

Samples were collected for silicon stocks as particulate biogenic and lithogenic silica (BSi and LSi) and dissolved orthosilicic acid ( $\text{Si}(\text{OH})_4$ ) similarly on both cruises. For BSi/LSi, between 1.5 and 2.5 L Niskin samples were filtered through stacked polycarbonate 47 mm filters. During BIOSOPE, whole samples were filtered through three stacked filters of 0.2, 2, and 10  $\mu\text{m}$ . During OUTPACE, the size-fractionation used was 0.4 and 3  $\mu\text{m}$  respectively. Filters were rinsed with 0.2  $\mu\text{m}$  filtered seawater, folded in quarters and placed in plastic Petri dishes and dried overnight at 60°C. Filters were then stored at room temperature and analyzed in the laboratory. BSi and LSi were measured using Paasche (1973) as modified by Nelson et al. (1989): BSi and LSi were extracted on the same filter after successive basic and acid treatments. BSi was extracted during a hot sodium hydroxide (NaOH 0.2 N) digestion (60 min), which converted BSi into the dissolved orthosilicic acid form.  $\text{Si}(\text{OH})_4$  was then quantified using the Strickland and Parsons (1972) spectrophotometric method. After the first basic digestion, filters were rinsed free of remaining  $\text{Si}(\text{OH})_4$  and dried again at 60°C. LSi, preserved in the sample, was then treated with hydrofluoric acid (HF 2.9 N) for 48 h. Samples were then diluted in saturated boric acid ( $\text{H}_3\text{BO}_3$ ). In the same way, LSi was measured through quantification of the dissolved  $\text{Si}(\text{OH})_4$  form. The detection limit was 1  $\text{nmol L}^{-1}$  for both BSi and LSi and quantification limits were 5 and 6  $\text{nmol L}^{-1}$  for BSi and LSi respectively.. It has been demonstrated that for coastal samples, significant leaching of orthosilicic acid from LSi could occur

during the first NaOH digestion (up to 15 %) (Ragueneau and Tréguer, 1994). This is particularly the case when high LSi concentrations are present. Kinetic assays of orthosilicic acid were conducted in some samples from the Marquesas, Gyre, East-Gyre and near Upwelling stations during BIOSOPE to determine the optimal extraction time for BSi digestion, and results revealed negligible LSi interferences after an extraction time of 60 min.

Biogenic silica export fluxes were determined from drifting sediment traps deployed for 4 consecutive days at three depths (153, 328, 519 m) at the three long duration stations of the OUTPACE cruise. For each trap samples, 160 mL were filtered onto 0.6 µm polycarbonate membranes and the filters were treated following a two-step digestion as described above. In addition to the BSi measurements, the dissolved Si measured directly in the supernatant of each trap at the time of subsampling minus the initial dissolved Si content in the seawater used to fill the trap was added to the final BSi concentrations, to account for BSi dissolution in the trap samples during storage. This step proved necessary, as BSi dissolution ranged between 16 and 90 % depending on the samples.

### **3.7 Size-fractionated bulk Si and specific uptake rates ( $\rho$ Si & VSi)**

During BIOSOPE, dawn-to-dawn in situ Si uptake experiments were performed using an immersed production line, at six incubation depths (50 %, 25 %, 15 %, 8 %, 4 % and 1 % light level). Seawater (275 mL) samples were spiked with 632 Bq of radiolabeled  $^{32}\text{Si}$ -silicic acid solution (specific activity of 23.46 kBq µg-Si<sup>-1</sup>). For all samples, Si(OH)<sub>4</sub> addition did not exceed 0.4 % of the initial concentration. After incubation, samples were filtered through stacked polycarbonate membranes (0.2, 2 and 10 µm, 47 mm). Filters were rinsed with filtered (0.2 µm) seawater, and placed in scintillation vials. The  $^{32}\text{Si}$  uptake was measured in a Packard 1600-TR scintillation counter by Cerenkov effect, following the method described by Tréguer and Lindner (1991) and Leynaert (1993). Precision of the method averages 10 % to 30 % for the less productive station, estimated from repeated counts. Diatom doubling times  $k$  (in d<sup>-1</sup>) were calculated as follows :

$$K = \ln ((\rho \text{ Si} + \text{BSi})/\text{BSi}) \quad (\text{Eq. 1})$$

### **3.9 Siliceous phytoplankton determinations**

Seawater samples collected from the same CTDs and Niskins as particulate Si samples were preserved with acidified Lugol's solution and stored at 4°C. For the BIOSOPE cruise, a 500 mL

aliquot of the sample was concentrated by sedimentation in glass cylinders for six days. Diatoms were counted following the method described by Gomez et al. (2007). For the OUTPACE cruise, a 100 mL aliquot of the sample was concentrated in an Utermöhl sedimentation chamber for 48h. Diatom sizes were measured for each species for an average number of 20 cells when possible, and converted to biovolume and C biomass following the method described in Leblanc et al. (2012). C biomass per species were then compared to chemically determined POC concentrations to yield a percent contribution to C biomass.

### **3.10 Phytoplankton net samples**

During the OUTPACE cruise, additional WP2 phyto-net hauls (mouth opening 0.26 m<sup>2</sup> ; 35 µm mesh-size) were undertaken at each site integrating the 0-150 m water column, except at stations LD-C, 14 and 15 where they integrated the 0-200 m water column due to the presence of a very deep Deep Chlorophyll *a* Maximum (DCM). Samples were preserved in acidified lugol, and observed in a Sedgewick-rafter chamber. A semi-quantitative species list (dominant, common, rare) was established.

## **4 Results**

### **4.1 Hydrological systems and nutrient availability**

The hydrological structures crossed during the two transects have been carefully detailed in companion papers (Claustre et al., 2008; Moutin et al., 2018; Fumenia et al., 2018) and will not be presented in detail here. For the sake of clarity in the present article, main hydrological systems are described as follows. During the BIOSOPE cruise, five main hydrological systems were defined from West to East: the HNLC system comprising long duration (LD) stations MAR (Marquesas) and HNL and station 1; the South Tropical Pacific (STP) system from stations 2 to 6; the central part of the South Pacific Gyre (SPG) from station 7 to 13 including the LD station GYR; the Eastern Gyre HNLC area from stations 14 to 19 including LD station EGY (Eastern Gyre); and the coastal Peru-Chile Upwelling system from station 20 to 21 including LD stations UPW and UPX. During OUTPACE, two main systems were encountered, from West to East, the MA (Melanesian Archipelago) from stations 1 to 12 and including LD stations A and B, and the South Pacific Gyre (SPG) from stations 13 to 15 and including LD station C.

During both cruises, eutrophic to ultra-oligotrophic conditions were encountered. During OUTPACE,  $\text{Si(OH)}_4$  concentrations were  $<1 \mu\text{M}$  at all stations in the surface layer, with values as low as  $0.3\text{--}0.6 \mu\text{M}$  at 5 m depth at certain stations (Fig. 2). The  $1 \mu\text{M}$  isoline was centered at  $\sim 100$  m in the western part of the MA, and deepened to  $\sim 200$  m in the SPG. Concentrations at 300 m were quite low ( $<2 \mu\text{M}$ ) over the entire transect. Nitrate concentrations were similarly depleted in the surface layer, with values  $<0.05\text{--}0.1 \mu\text{M}$  in the first 80 m in the western part of the MA (until station 6), which deepened to 100 m over the rest of the transect. Yet nitrate concentrations increased with depth more rapidly than orthosilicic acid, reaching concentrations close to  $7 \mu\text{M}$  at 300 m depth.

Phosphate was below detection limits in the western part of the MA (stations 1 to 11, and station B) over the first 50 m, but increased to values comprised between  $0.1$  and  $0.2 \mu\text{M}$  in the SPG. Concentrations only increased to  $0.6\text{--}0.7 \mu\text{M}$  at 300 m depth.

During BIOSOPE, both the nitracline and phosphacline extended very deeply ( $\sim 200$  m) in the regions of the STP, SPG and Eastern Gyre (Fig. 3). They surfaced at both ends of the transect in the upwelling system and near the Marquesas Islands, but contrary to nitrate which was severely depleted, phosphate was never found  $<0.1 \mu\text{M}$  in the surface layer (except at the subsurface at site 14). Horizontal gradients were not as strong for orthosilicic acid, with general surface values comprised between  $0.5$  and  $1 \mu\text{M}$  in the surface layer, except in the western part of the transect from station 1 to the GYR station, and in the upwelling system, where concentrations were  $> 1 \mu\text{M}$  and up to  $8.9 \mu\text{M}$  at the surface and increasing rapidly with depth.

#### **4.2 Total Chl*a* and fucoxanthin distribution**

Total Chl*a* (TChl*a*) distributions are presented for both cruises along longitudinal transects together with fucoxanthin concentrations, a diagnostic pigment for diatoms (Fig. 4a, b). During OUTPACE, the Melanesian Archipelago system was clearly enriched in TChl*a* compared to the South Pacific Gyre and showed non-negligible concentrations in surface layers as well as a pronounced DCM reaching up to  $0.45 \mu\text{g L}^{-1}$  at station 11. The observed DCM progressively deepened eastwards, from 70 m depth at LD-A to 108 m at station 12. The DCM depth generally closely followed the euphotic layer depth ( $Z_{\text{eu}}$ ) or was located just below it. The highest surface concentrations were found at stations 1 to 6, between New Caledonia and Vanuatu ( $0.17$  to  $0.34 \mu\text{g L}^{-1}$ ) while the SPG surface water stations showed a depletion in Chl*a* ( $0.02$  to  $0.04 \mu\text{g L}^{-1}$ ). A DCM existed in this



region, but was observed to be deeper (125 to 150 m) and of lower magnitude ( $0.17$  to  $0.23 \mu\text{g L}^{-1}$ ) than in the MA region. Fucoxanthin concentrations closely followed the DCM, but were extremely low over the entire transect, with a maximum concentration of  $17 \text{ ng L}^{-1}$  in the MA and of  $4 \text{ ng L}^{-1}$  in the SPG.

The *Chla* distribution during BIOSOPE was similar to that observed during OUPACE, with extremely low surface concentrations and a very deep *Chla* maximum located between 180 - 200 m ranging between  $0.15$  and  $0.18 \mu\text{g L}^{-1}$ . On both sides of the central SPG, the DCM shoaled towards the surface at the MAR station at the western end of the transect ( $0.48 \mu\text{g L}^{-1}$  at 30 m) and at the UPW station at the eastern end of the transect ( $3.06 \mu\text{g L}^{-1}$  at 40 m). Fucoxanthin concentrations did not exceed  $9 \text{ ng L}^{-1}$  at any station between the STP and the Eastern Gyre (between LD-HNL and station 17), thus showing ranges similar to the OUTPACE cruise measurements. Fucoxanthin increased moderately at the MAR station ( $85 \text{ ng L}^{-1}$ ), while it peaked in the Peru-Chile upwelling system with concentrations reaching  $1,595 \text{ ng L}^{-1}$  at LD-UPW but remained much lower at the LD-UPX station ( $200 \text{ ng L}^{-1}$ ).

#### 4.3 Total and size-fractionated Biogenic and Lithogenic Silica standing stocks

Total Biogenic silica (BSi) concentrations were extremely low during the OUTPACE cruise (Fig. 5a) and ranged between 2 and  $121 \text{ nmol L}^{-1}$  in the surface layers, with an average concentration of  $17 \text{ nmol L}^{-1}$  (median value  $13 \text{ nmol L}^{-1}$ ). Similarly to *TChla* and fucoxanthin, the highest BSi levels were encountered over the MA, with peak values mostly found at the surface, at stations 1 and 2 and from stations 4 to 7, and with very moderate increases at depth (stations 5 and 10). The average BSi concentration decreased from 20 to  $8 \text{ nmol L}^{-1}$  from the MA to the SPG. In the SPG, maximum BSi levels were found at the DCM, between 125 and 150 m. Total Lithogenic Silica (LSi) concentrations were measured in a very similar range (Fig. 5b), between 2 and  $195 \text{ nmol L}^{-1}$ , with a peak value at station 2 at 100 m. Also, LSi was ranged from 5 to  $30 \text{ nmol L}^{-1}$  over the transect, with highest values observed close to 100 m, while averaged concentrations followed the same trend as BSi, decreasing from 16 to  $9 \text{ nmol L}^{-1}$  between the MA and the SPG.

During the BIOSOPE cruise, three main regions could be differentiated: a first region covering the ultra-oligotrophic central area from station 1 to station 20, where average BSi concentrations were as low as  $8 \text{ nmol L}^{-1}$  (Fig. 5c). At the western end of the transect, the first three stations in the vicinity of the Marquesas Islands had higher concentrations with average values of  $104 \text{ nmol L}^{-1}$ .

The eastern end of the transect, located in the Peru-Chile Upwelling system, displayed much higher and variable values, averaging  $644 \text{ nmol L}^{-1}$ , with a maximum concentration of  $2,440 \text{ nmol L}^{-1}$  at the UPW station at 60 m. At both ends of the transect, siliceous biomass was mainly distributed in the upper 100 m. Lithogenic silica followed the same trends (Fig. 5d), with extremely low values over the central area (average of  $7 \text{ nmol L}^{-1}$ ) with a few peaks close to  $30 \text{ nmol L}^{-1}$  (stations 12 and EGY). LSi concentrations were highest at both ends of the transect but concentrations remained below those of BSi, with average LSi values of  $26 \text{ nmol L}^{-1}$  close to the Marquesas, and of  $57 \text{ nmol L}^{-1}$  in the coastal upwelling system. The maximum values close to  $150 \text{ nmol L}^{-1}$  were associated to the BSi maximums at the UPW sites.

Size-fractionated integrated BSi stocks were calculated for both cruises over the 0-125 m layer, except for the BIOSOPE cruise at station UPW1, which was only integrated over 50 m and at stations UPX1 and UPX2 which were integrated over 100 m (Fig. 6a, b, Appendix 1). Total BSi stocks were similarly very low in the ultra oligotrophic central gyre and averaged  $1 \text{ mmol Si m}^{-2}$  during both cruises. During BIOSOPE, the stocks measured closed to the Marquesas averaged  $9.85 \text{ mmol Si m}^{-2}$  (with a peak of  $24.12 \text{ mmol Si m}^{-2}$  at the MAR station). On the eastern end of the transect, stocks increased to a peak value of  $142.81 \text{ mmol Si m}^{-2}$  at the UPW2 station and averaged  $65.68 \text{ mmol Si m}^{-2}$  over the coastal upwelling system. Size-fractionation was only carried out at the long duration stations, but showed an overall non negligible contribution of the pico-sized fraction ( $0.2\text{-}2 \text{ }\mu\text{m}$ ) to BSi standing stocks of  $11 \pm 9 \%$ . This contribution of the pico-size fraction to integrated siliceous biomass was highest at the GYR, EGY and UPX1 stations reaching 25, 18 and 24 % respectively.

During OUTPACE, integrated BSi stocks ranged between  $1.25$  and  $4.11 \text{ mmol Si m}^{-2}$  over the MA, and decreased to  $0.84$  to  $1.28 \text{ mmol Si m}^{-2}$  over the SPG (Fig. 6c, Appendix 2). Here, size-fractionation was conducted at all sites and the contribution of the  $0.4 - 3 \text{ }\mu\text{m}$ , which will be attributed to the pico-size fraction hereafter, was higher than during BIOSOPE, with an average contribution of  $26 \pm 12 \%$ . The importance of the picoplanktonic Si biomass was higher in the SPG ( $36 \pm 12 \%$ ,  $n=14$ ) than over the MA ( $22 \pm 10 \%$ ,  $n=5$ ) but not statistically different ( $p > 0.05$ ).

#### 4.4 Si uptake rates

Si uptake rate measurements using the  $^{32}\text{Si}$  radioactive isotope were only conducted during the BIOSOPE cruise. Rank order of most productive stations follow the pattern observed for BSi with

the highest values observed at UPW followed by UPX and MAR stations. Vertical profiles of gross production rates ( $\rho$  Si) confirm the previous stock information and show that the most productive stations, in decreasing order of importance, are the UPW, UPX and MAR stations (Fig. 7a), with 1.98, 1.19 and 0.22  $\mu\text{mol Si L}^{-1} \text{d}^{-1}$  at 10 m respectively. Si uptake rates remained below 0.015  $\mu\text{mol Si L}^{-1} \text{d}^{-1}$  at central HNLC and oligotrophic stations HNL, EGY and GYR. Si uptake rates in the picoplanktonic size fraction showed similar trends (Fig. 7b), despite higher values at UPX (0.076  $\mu\text{mol Si L}^{-1} \text{d}^{-1}$ ) than at UPW (0.034  $\mu\text{mol Si L}^{-1} \text{d}^{-1}$ ). Uptake rates in that size fraction were intermediate at the MAR station with maximum value of 0.005  $\mu\text{mol Si L}^{-1} \text{d}^{-1}$ , while it remained below 0.001  $\mu\text{mol Si L}^{-1} \text{d}^{-1}$  at the central stations. Specific Si uptake (VS<sub>i</sub> normalized to BS<sub>i</sub>) rates for the picoplanktonic size fraction were even more elevated and reached maximum values of 3.64, 1.32, 0.75, 0.37 and 0.14  $\text{d}^{-1}$  at the UPW, UPX, HNL, EGY and MAR stations respectively. Total specific Si uptake rates were extremely high in the coastal upwelling system, with values of 2.57 and 1.75  $\text{d}^{-1}$  at UPX and UPW respectively, and lower but still elevated values at the MAR station (0.75  $\text{d}^{-1}$ ). VS<sub>i</sub> at the central stations (HNL, EGY, GYR) were moderate to low and ranged between 0.02 and 0.24  $\text{d}^{-1}$ .

Total  $\Sigma \rho$  Si reached 52.4  $\text{mmol Si m}^{-2} \text{d}^{-1}$  at UPW2 station, an order of magnitude higher than the rate measured at the MAR station (5.9  $\text{mmol Si m}^{-2} \text{d}^{-1}$ ) and 3 orders of magnitude higher than at EGY, where the lowest value was obtained (0.04  $\text{mmol Si m}^{-2} \text{d}^{-1}$ ). Integrated picoplanktonic Si uptake rates ( $\Sigma \rho$  Si for 0.2-2  $\mu\text{m}$ ) were highest at both upwelling stations (Table 1), followed by the MAR station. The relative average contribution of the picoplanktonic size fraction to total Si uptake rates was highest at the central stations (32 % at GYR, 19 % at EGY and 11 % at HNL) while it was lowest on both ends of the transect (5 % at MAR, and 3 and 7 % at UPW and UPX stations).

Diatom doubling times were calculated at each depth following Eq. (1) and are shown in Fig. 8 for each station. The lowest  $k$  were found at the HNL, GYR and EGY stations where median values remained  $< 0.2 \text{d}^{-1}$ . The median value was similar at the MAR station but with a larger interquartile and a higher maximum value of 0.56  $\text{d}^{-1}$ . Doubling times were most elevated at the UPW (0.75  $\text{d}^{-1}$ ) and UPX (0.92  $\text{d}^{-1}$ ) stations and the maximum value for the cruise was 1.27  $\text{d}^{-1}$  at the UPX station at the surface.

#### 4.5 Diatom distribution and community structure

Microscopical examinations confirmed the presence of diatoms at every station during both cruises. Diatoms were found in very low abundances during the OUTPACE cruise and only reached maximum values of 20,000-30,000 cells L<sup>-1</sup> on two occasions, at stations LD-B at the surface and at station 5 at the DCM (Fig. 9a). Mean diatom concentrations in the MA at the surface were 4,440 ± 7,650 cells L<sup>-1</sup> while at the DCM, mean concentrations were about 2-fold lower (2,250 ± 4,990 cells L<sup>-1</sup>). Diatom abundance decreased dramatically in the SPG, with values as low as 25 ± 19 cells L<sup>-1</sup> at the surface layers and 145 ± 54 cells L<sup>-1</sup> at the DCM. The richness of diatoms was higher in the MA than in the SPG, with an average number of taxa of respectively 9 ± 4 and 2 ± 1 in the surface layer (Fig. 9b). The richness increased at the DCM level, with 12 ± 8 taxa in the MA and 5 ± 1 taxa in the SPG. Diatom contribution to biomass was accordingly extremely low and remained below 3 % (Fig. 9c). The diatom contribution to C biomass increased more significantly only at two stations: at station LD-B (9 % at the surface) and at station 5 where the maximum value for the cruise was observed (11.5 % at the DCM).

During BIOSOPE, the central stations showed the lowest diatom abundance with less than 100 cells L<sup>-1</sup> from stations 2 to EGY (Fig. 10). The eastern part of the SPG and the HNL stations were characterized by slightly higher abundances (from 100 to 1,000 cells L<sup>-1</sup>), followed by the UPX station, where abundances were similar to the MAR station at the surface (~25,000 cells L<sup>-1</sup>). Highest abundances were observed at the UPW, with bloom values of 256,000 cells L<sup>-1</sup> on average (with a peak abundance of 565,000 cells L<sup>-1</sup> at the surface). Similar results compared to OUTPACE showed an extremely low richness at all central stations (data not shown) with on average 3 ± 2 diatom taxa, while richness increased at the western HNLC region with 13 ± 4 taxa at the MAR and HNL stations. Richness was highest at the UPW station with 20 ± 4 taxa and decreased again at the UPX station (5 ± 3).

The dominant diatom species for each system sampled over the course of the two cruises are summarized in Table 2 and Appendix 3. During OUTPACE, very similar species were encountered in both regions and were mainly dominated by pennate species such as *Pseudo-nitzschia* spp., *P. delicatissima*, *Cylindrotheca closterium* and *Mastogloia woodiana*. However, Diatom-Diazotroph Associations (DDAs) such as *Rhizosolenia styliformis*, *Climacodium frauenfeldianum* and *Hemiaulus hauckii* were more abundantly found in the MA. Other siliceous organisms such as radiolaria were also more abundant in the SPG and at LD-B than in the MA (Appendix 3). Overall

microplanktonic diazotroph abundance were much higher over the MA than in the gyre, with a predominance in plankton nets of *Trichodesmium*, *Richelia intracellularis* (alone or in DDAs), *Crocospaera* and other filamentous cyanobacteria such as *Katagnymene* (Appendix 3).

Diatom community structure for the BIOSOPE cruise has already been discussed extensively in Gomez et al. (2007). In summary, the stations characterized by medium diatom abundances such as MAR, HNL, 18, 20 and EGY (Fig. 10) were mainly dominated by the pennate diatom *Pseudo-nitzschia delicatissima* in particular at the MAR station, where it represented on average 90 % of all diatoms over the 0-100 m layer. Extremely low abundance stations ( $< 200$  cells  $L^{-1}$ ) from the middle of the SPG (stations 2 to 14) did not show any consistent community, with varying dominant species across stations and along vertical profiles as well. Maximum abundances at these sites were consistently found at depth, between 100 and 200 m. In the Peru-Chile upwelling, diatom community structure was mostly dominated by small and colonial centric species such as *Chaetoceros compressus* and *Bacteriastrum* spp. at the UPW station where abundances were highest (565,000 cells  $L^{-1}$ ) and such as *Skeletonema* sp. and *Thalassiosira anguste-lineata* at the UPX station where abundances decreased to 10,000-40,000 cells  $L^{-1}$ . In this system, the highest abundances were found in the first 10 m.

#### 4.6 Si export fluxes

Particulate silica export fluxes were measured from drifting trap deployments at each long duration station during OUTPACE and are presented in Table 3. BSi daily export fluxes below the mixed layer at 153, 328 and 529 m were extremely low at all sites, with lowest values at site A (0.5 to 0.1  $\mu\text{mol Si m}^{-2} \text{ d}^{-1}$ ), highest at site B (3 to 5  $\mu\text{mol Si m}^{-2} \text{ d}^{-1}$ ) and intermediate at site C (0.5 to 2  $\mu\text{mol Si m}^{-2} \text{ d}^{-1}$ ).

### 5 Discussion

#### 5.1 Si budgets for the South Pacific

In the following section, values from previous studies are compared (Table 4) with the results obtained across this under-studied region of the Pacific Ocean, which is characterized by the most oligotrophic and Chl*a* depleted waters worldwide (Ras et al., 2008). We obtained size-fractionated biomass and export fluxes during the OUTPACE program, and size-fractionated production and biomass budgets during the BIOSOPE program.

Regarding values obtained at both ends of the BIOSOPE transects, i.e. in the Peru-Chile upwelling system and in the HNLC system surrounding the Marquesas Islands,  $\Sigma \rho$  Si rates compare well with previous studies from other similar regions (Table 4). Integrated Si production rates at the UPW stations are in the middle range (42-52 mmol Si m<sup>-2</sup> d<sup>-1</sup>) of what was previously found in coastal upwellings. Values are however almost double to what was previously observed in the Peru upwelling by Nelson et al. (1981), although less productive than the Monterey Bay and Baja Californian upwelling systems (Nelson and Goering, 1978; Brzezinski et al., 1997). For oceanic HNLC areas, values obtained (0.8 to 5.6 mmol Si m<sup>-2</sup> d<sup>-1</sup>) cover the range of rates measured in HNLC to mesotrophic systems of the North Atlantic, Central Equatorial Pacific and Mediterranean Sea. However, integrated rates obtained for the oligotrophic area of the South Eastern Pacific Gyre are to our knowledge among the lowest ever measured, even taking into account the error associated to budget estimates this close to analytical detection limits. Values range from 0.04 to 0.20 mmol Si m<sup>-2</sup> d<sup>-1</sup>, they are thus lower than average values previously measured at BATS and ALOHA stations (0.42 and 0.19 mmol Si m<sup>-2</sup> d<sup>-1</sup> respectively) (Brzezinski and Kosman, 1996; Nelson and Brzezinski, 1997; Brzezinski et al., 2011). However, they are similar to measurements performed in autumn (0.04-0.08 mmol Si m<sup>-2</sup> d<sup>-1</sup>) in a severely Si-limited regime of the North Atlantic (Leblanc et al., 2005b). Previous studies have documented limitation of diatom Si production by Si (Leynaert et al., 2001), but more recently evidence of co-limitation by both Si and Fe was found in the central Equatorial Pacific (Brzezinski et al., 2008). This would be a more than likely scenario for the SPG, given the very low silicic acid (Fig.2 & 3) and Fe concentrations (0.1 nM and ferricline below 350 m depth, Blain et al., 2008) measured during both cruises.

The approximate surface area of mid-ocean gyres was estimated to be  $1.3 \times 10^8$  km<sup>2</sup> (representing approximately 1/3 of the global ocean) yielding a global contribution of only 26 Tmol Si y<sup>-1</sup> gross silica production, i.e. approximately 9-13% of the budget calculated for the global ocean of 240 Tmol Si y<sup>-1</sup> according to Nelson et al. (1995). This budget has been recently revised down to 13 Tmol Si y<sup>-1</sup> when considering budgets from the North Pacific (Nelson and Brzezinski, 1997) reducing the contribution of subtropical gyres to 5-7% of global marine silica production (Brzezinski et al., 2011; Tréguer and de La Rocha, 2013). However, the range provided in Nelson et al. (1995) in the calculation of their global Si production fluxes for mid-ocean gyres was of 0.2 – 1.6 mmol m<sup>-2</sup> d<sup>-1</sup>. Our values would, once again, lower the contribution of these vast oceanic regions to global Si production, although the present data is only based on two production station

measurements and warrants further measurements for this region. Nevertheless, it can be expected that the most ultra-oligotrophic region of the world ocean would contribute even less to total Si production than the other oligotrophic systems listed in Table 4 and that in particular, the Si production in the ultra-oligotrophic Southern Tropical Gyre would be lower than the Northern Tropical Gyre.

Integrated Si biomass also reflects the very low contribution of diatoms in this system, which was more than 2-fold lower in the South Pacific Gyre than in the Melanesian Archipelago (Table 5). In the SPG, the lowest Si stocks were measured ( $\sim 1 \text{ mmol Si m}^{-2}$ ), and were similar to lower-end values found in the ultra-oligotrophic Eastern Mediterranean Basin in autumn and in other oligotrophic areas of the North Pacific Subtropical Gyre and of the Sargasso Sea (Table 5 and references therein). It is probable that  $\Sigma \rho$  Si production and BSi stocks could have been slightly higher less than a month earlier in the season on the western part of the OUTPACE transect in the MA. Indeed, the satellite-based temporal evolution of Chl *a* at stations LD-A and LD-B showed decreasing concentrations at the time of sampling (de Verneil et al., 2018), while the situation did not show any temporal evolution for the SPG, thus suggesting that the biogenic silica budget for this area is quite conservative under a close to steady-state situation.

Lastly, our Si export flux measurements by drifting sediment traps are the lowest ever measured and are about two orders of magnitude lower than those from other oligotrophic sites such as BATS in the Atlantic or ALOHA in the Pacific Ocean (Table 6). They represent a strongly negligible fraction of surface Si stocks, implying no sedimentation at the time of sampling, and that active recycling and grazing occurred in the surface layer. Indeed, surface temperatures higher than 29°C at all long duration sites, may favor intense dissolution in the upper layer, while active zooplankton grazing was also documented, removing between 3 and 21% of phytoplankton stocks daily (Carlotti et al., 2018). The virtual absence of silica export from the surface layer well agrees with the conclusion of Nelson *et al.* (1995) that no siliceous sediment is accumulating beneath the central ocean gyres.

## 5.2 Siliceous plankton community structure in the South Tropical Pacific

The main feature observed during OUTPACE was a bi-modal distribution of diatom communities, either at the surface and/or at the DCM level depending on stations, which deepened towards the East, following the increasing oligotrophy gradient, similarly to what was previously described in

the Mediterranean Sea (Crombet et al., 2011). A similar feature, showing a particularly deep DCM, up to 190 m in the SPG at 1.2-fold the euphotic depth (Ras et al., 2008), was observed during BIOSOPE, revealing a known strategy for autotrophic plankton cells in nutrient depleted waters to stay at the depth where the best light vs nutrient ratio is obtained (Quéguiner, 2013).

While DCM's are common in mid-ocean gyres and are known to be often dominated by pico-sized phytoplankton (Chavez et al., 1996), studies documenting phytoplankton community structure in the South Tropical Pacific Ocean, an area formerly called a « biological desert », are still very scarce. In the review of planktonic diatom distribution by Guillard and Kilham (1977) referencing biocenoses for all main oceanic water bodies and for which thousands of articles were processed, the diatom composition for the South Tropical region was referred to as « No species given (flora too poor) ». Since then only a few studies mentioning phytoplankton community structure, mostly located along the equator were published, such as Chavez et al. (1990); Chavez et al. (1991); Iriarte and Fryxell (1995); Kaczmarek and Fryxell (1995); and Blain et al. (1997). In Semina and Levashova (1993) some biogeographical distribution of phytoplankton including diatoms is given for the entire Pacific region, yet the Southern tropical region is limited to more historical Russian data and rely on very few stations. The only diatom distribution for the South Tropical Gyre was published for the present data set by Gomez et al. (2007) in the BIOSOPE special issue. Hence the present data contributes to documenting a severely understudied, yet vast area of the world ocean. The oceanic regions covered during both cruises may be clustered into three main ecological systems with relatively similar diatom community structures: the nutrient-rich coastal upwelling system near the Peru-Chile coast, where diatom concentrations exceeded 100,000 cells L<sup>-1</sup>, the Fe-fertilized areas of the Melanesian Archipelago and West of Marquesas Islands, where concentrations could locally exceed 10,000 cells L<sup>-1</sup>, and all the other ultra-oligotrophic regions (mainly the South Pacific Gyre system) characterized by extremely low diatom abundances, usually <200 cells L<sup>-1</sup>.

The upwelling area was characterized by a distinct community, not found in the other regions, composed of typical neritic and centric colonial species such as *Skeletonema* sp., *Bacteriastrium* spp., *Chaetoceros compressus*, *Thalassiosira subtilis* and *T. anguste-lineata*. These first three species were already documented as abundant in the Chile upwelling by Avaria and Munoz (1987), whereas *T. anguste-lineata* was reported along the Chilean coast from 20°S to 36°S (Rivera et al., 1996) and was also documented in the upwelling system West of the Galapagos Islands (Jimenez,



1981). The highest  $\rho$  Si production values were measured at the offshore UPW station where *Bacteriastrium* spp. and *Chaetoceros compressus* co-occurred as the two dominant species, whereas  $\rho$  Si rates were halved at the closest coastal station UPX, associated to lower abundances of diatoms, with co-occurring dominance by *Skeletonema* sp. and *Thalassiosira anguste-lineata*. The HNLC regions off the Marquesas Islands (MAR) and in the Eastern Gyre (stations 14-20, BIOSOPE) and the oligotrophic region (N-deprived but Fe-fertilized region of the MA), with bloom situations at stations 5 and LD-B (OUTPACE), showed strong similarities in terms of diatom community structure and were all mainly dominated by the medium-sized pennate diatoms of the *Pseudo-nitzschia delicatissima/subpacific*a species complex. These pennate species are commonly reported for the Central and Equatorial Pacific Ocean (Guillard and Kilham, 1977; Iriarte and Fryxell, 1995; Blain et al., 1997). During BIOSOPE, *Pseudo-nitzschia delicatissima* were often seen forming « needle balls » of ~100  $\mu$ m diameter which suggests an anti-grazing strategy from micro-grazers (Gomez et al., 2007), a strategy already described by several authors (Hasle, 1960; Buck and Chavez, 1994; Iriarte and Fryxell, 1995). Predominance of pennate diatoms over centrics has previously been observed in the N-depleted environment of the Equatorial Pacific (Blain et al., 1997; Kobayashi and Takahashi, 2002), and could correspond to an ecological response to diffusion-limited uptake rates, favoring elongated shapes, as suggested by Chisholm (1992). Furthermore, net samples from the OUTPACE cruise showed a numerically dominant contribution of *Cylindrotheca closterium* over 0-150 m at most stations of the MA (Appendix 3), with a strong dominance at LD-B, even though their contribution to biomass is minor given their small size. However, it should be noted that if small fast growing pennates were numerically dominant, their relative contribution to C biomass was very small compared to that of few larger centrics such as *Pseudosolenia calcar-avis*, which when present dominated in terms of biomass, similarly to what had already been observed in the South Pacific with large *Rhizosolenia* (Shipe et al., 1999). *Pseudo-nitzschia* sp. and *Cylindrotheca closterium* have been shown to bloom upon Fe-addition experiments (Chavez et al., 1991; Fryxell and Kaczmarska, 1994; Leblanc et al., 2005a; Assmy et al., 2007) and may reflect the significantly higher dissolved Fe concentrations measured in the MA (average 1.9 nM in the first 100 m) compared to the SPG (0.3 nM) (Guieu et al., in rev). In the Equatorial Pacific, Fe-amendment experiments evidenced the rapid growth of *Cylindrotheca closterium*, with a high doubling rate close to 3 d<sup>-1</sup> (Fryxell and Kaczmarska, 1994), which can explain why this species is often numerically dominant.

Fast growing colonial centric diatoms such as *Chaetoceros* spp. were notably absent from the MA, except at stations 5 and LD-B, where mesoscale circulation increased fertilization (de Verneil et al., 2018) and allowed a moderate growth (observed in both Niskin samples and net hauls), resulting in an increased contribution of diatoms to total C biomass of approximately 10% (Fig. 9c). Other typical bloom species such as *Thalassiosira* spp. were completely absent from the species from the Niskin samples but observed at low abundance in some net haul samples. Nonetheless, very large centrics typical of oligotrophic waters such as *Rhizolenia calcar-avis* (Guillard and Kilham, 1977) were present in low numbers at all stations and in all net hauls, and represented a non-negligible contribution to biomass despite their low abundance.

One difference with the N-replete Marquesas HNLC system was that the hydrological conditions of the MA were highly favorable for the growth of diazotrophs, with warm waters (>29°C), depleted N in the surface layer associated to high Fe levels, while P was likely the ultimate controlling factor of N-input by N<sub>2</sub>-fixation in this region (Moutin et al., 2008; Moutin et al., 2018). N<sub>2</sub>-fixation rates were among the highest ever measured in the open ocean during OUTPACE in this region (Bonnet et al., 2017), and the development of a mixed community, composed of filamentous cyanobacteria such as *Trichodesmium* spp. and other spiraled-shaped species, unicellular diazotrophs such as UCYN, *Crocospaera watsonii*, and Diatom-Diazotroph Associations (DDAs) was observed (Appendix 3). The highest rates were measured at the surface at stations 1, 5, 6 and LD-B (Caffin et al., this issue) and the major contributor to N<sub>2</sub>-fixation in MA waters was by far *Trichodesmium* (Bonnet et al., 2018). In the Niskin cell counts, DDAs known to live in association with the diazotroph *Richelia intracellularis* such as *Hemiaulus hauckii*, *Chaetoceros compressus* and several species of *Rhizolenia* such as *R. styliiformis*, *R. bergonii*, *R. imbricata* and the centric *Climacodium frauenfeldianum* known to harbor a genus related to *Cyanothece* sp. (Carpenter, 2002) were all found in low abundance in the water sample cell counts, contributing to less than 1% of total diatoms. Exceptions were observed at sites 1 and 2 where their contributions increased to 2.3 and 8% respectively. The low contribution of DDAs to the diazotrophs community was confirmed by direct cell counts and nifH gene sequencing (Stenegren et al., 2018). Notably, the presence of *Richelia intracellularis* was not observed in the Niskin lugol-fixed water samples, but *Rhizolenia styliiformis* with *Richelia*, and some isolated *Richelia* cells were observed abundantly in net hauls. The latter were found to be dominant at stations 1 and LD-B, where the highest fixation rates were measured. *Richelia*, alone or in association with *R.*

*styliiformis* were much less abundant in the South Pacific Gyre, where Fe is prone to be the limiting nutrient for N<sub>2</sub>-fixation rates despite higher P availability, pointing to less favorable growth conditions for diazotrophs. Yet, the overall dominance of *Trichodesmium*, *Crocosphaera* and other filamentous cyanobacteria (Appendix 3) in the net samples reveals that DDAs were very minor contributors to N<sub>2</sub>-fixation during OUTPACE. This was also evidenced through NanoSIMS analyses (Caffin et al., 2018).

In order to explain the growth of diatoms in this severely N-depleted region, one can quote the use of diazotroph-derived nitrogen (DDN), i.e. the secondary release of N<sub>2</sub> fixed by diazotrophs, which showed to be efficiently channeled through the entire plankton community during the VAHINE mesocosm experiment (Bonnet et al., 2016). In this latter study off shore New Caledonia, *Cylindrotheca closterium* grew extensively after a stimulation of diazotrophy after P-addition in large volume in situ mesocosms in New Caledonia (Leblanc et al., 2016). As previous studies had already observed a co-occurrence of elevated *C. closterium* with several diazotrophs (Devassy et al., 1978; Bonnet et al., 2016), this recurrent association tends to confirm our previous hypothesis of a likely efficient use of DDN released as NH<sub>4</sub> by this fast growing species (Leblanc et al., 2016). This could be another factor, besides Fe-availability, explaining its success. A similar hypothesis may be invoked for the presence of *Mastogloia woodiana*, a pennate diatom known to be occasionally dominant in the North Pacific Subtropical Gyre blooms (Dore et al., 2008; Villareal et al., 2011). It is also a characteristic species of oligotrophic areas (Guillard and Kilham, 1977), often observed in association with other DDAs, which could similarly benefit from secondary N-release (Villareal et al., 2011; Krause et al., 2013).

Lastly, the ultra-oligotrophic region of the SPG investigated both during OUTPACE and BIOSOPE revealed a base-line contribution of diatoms with often less than 200 cells L<sup>-1</sup> at the DCM and close to zero at the surface. In addition, a dominance of small and large pennate species was observed, such as *Nitzschia bicaudata*, *Pseudo-nitzschia delicatissima*, *Thalassiothrix longissima*, *Thalassionema elegans* and *Pseudoeunotia* sp., that have already been documented for the Equatorial Pacific by Guillard and Kilham (1977). Occasional occurrences of some emblematic species of oligotrophic regions were also observed, such as *Chaetoceros dadayi*, *C. peruvianus*, *C. tetrastrichon* or *Planktoniella sol*. It can be noted that radiolarians were also more abundant and more diverse in the ultra-oligotrophic SPG during OUTPACE than in the MA, while unfortunately no information regarding radiolarians is available for the BIOSOPE cruise.

### 5.3 Evidence for active Si uptake in the pico-planktonic size-fraction in the South Tropical Pacific

The pico-size fraction (<2-3  $\mu\text{m}$ ) represented on average 11% of BSi stocks during BIOSOPE, and 26% of BSi stocks during OUTPACE (Fig. 6), which is a non-negligible contribution. The significant contribution of the pico-size fraction to the BSi stocks during both cruises could be explained by the presence of detrital components, however its contribution to  $\text{Si}(\text{OH})_4$  uptake during BIOSOPE was really surprising but can be explained in the light of new findings. Indeed, recent studies have evidenced that the pico-phytoplanktonic cyanobacteria *Synechococcus* can assimilate Si (Baines et al., 2012; Ohnemus et al., 2016; Krause et al., 2017; Brzezinski et al., 2017), which could explain why Si stocks were detected in this size fraction. The first hypothesis was to consider broken fragments of siliceous cells passing through the filter or interferences by lithogenic silica, but these hypotheses were invalidated during BIOSOPE when Si uptake measurements using  $^{32}\text{Si}$  were also carried out on this pico-size fraction and revealed a non-negligible uptake, mainly in the Chilean upwelling systems (Fig. 7). Our results are thus in line with previous findings, as no other organisms below 2-3  $\mu\text{m}$  are known to assimilate Si, except some small size Parmales, a poorly described siliceous armored planktonic group which span over the 2-10  $\mu\text{m}$  size class, such as *Tetraparma* sp. (Ichinomiya, 2016), or small nano-planktonic diatoms such as *Minidiscus* (Leblanc et al., 2018), close to the 2  $\mu\text{m}$  limit (Fig. 11 a,b). The latter two species could occur in the 2-3  $\mu\text{m}$  size-fraction, but are very easily missed in light microscopy and require SEM imaging or molecular work for correct identification. Presence of Parmales or nano-planktonic diatoms may explain the measurement of BSi in this 0.4 – 3  $\mu\text{m}$  size-class for the OUTPACE cruise, but can be excluded as responsible for the Si uptake measured during BIOSOPE on filters below 2  $\mu\text{m}$ . Rather, during OUTPACE, NanoSIMS imaging revealed that cytometrically sorted *Synechococcus* cells accumulated Si (Fig. 11 c), confirming their potential role in the Si cycle in the South Tropical Gyre.

According to Baines et al. (2012), the Si content of *Synechococcus*, in some cases, could exceed that of diatoms, but these authors suggested that they might exert a larger control on the Si cycle in nutrient-poor waters where these organisms are dominant. In the present study, the largest contribution of the pico-size fraction to absolute  $\Sigma \rho$  Si uptake rates occurred at both ends of the transect in the Peru-Chile upwelling region and at the MAR station (Table 1), locations which also corresponded to the highest concentrations of *Synechococcus* observed (Grob et al., 2007).

However, compared to diatoms, this only represented 1 to 5 % of total  $\Sigma \rho$  Si uptake, which is probably not likely to drive the Si drawdown in this environment. This low relative contribution to  $\Sigma \rho$  Si was similarly found at the other end of the transect at HNL and MAR station, but where absolute uptake rates were moderate. The largest contribution of the pico-size fraction was measured in the SPG (GYR and EGY sites), where despite very low  $\rho$  Si values, the relative  $\Sigma \rho$  Si uptake between 0.2 and 2  $\mu$ m reached 16 to 25 %. Station GYR as well as stations 13 to 15 are areas that are highly depleted in orthosilicic acid, with concentrations  $<1$   $\mu$ M from the surface to as deep as 240 m. Hence, it is probable that *Synechococcus* could play a role in depleting the Si of surface waters in this area, which are devoid of diatoms.

During the OUTPACE cruise, there were no clear correlations between *Synechococcus* distributions and the measured 0.4-3  $\mu$ m BSi concentrations. This could be explained by the extremely wide range of individual cellular Si quotas estimated to vary between 1 and 4700 amol Si cell<sup>-1</sup> (with an average value of 43) from cells collected in the North Western Atlantic (Ohnemus et al., 2016), where *Synechococcus* contributed up to 23.5 % of  $\Sigma$  BSi (Krause et al., 2017). In the latter study, a first-order estimate of the contribution of *Synechococcus* to the global annual Si production flux amounted to 0.7-3.5%, which is certainly low, but comparable to some other important input or output fluxes of Si (Tréguer and De la Rocha, 2013). Using the range of measured Si cellular content per *Synechococcus* cells given in Ohnemus et al. (2016) of 14 to 64 amol Si cell<sup>-1</sup> and *Synechococcus* abundance data from the same casts obtained in flow cytometry (data courtesy of S. Duhamel, Lamont Doherty, NY), this yields a potential contribution of 3 to 14 % of *Synechococcus* to the small BSi fraction, which is close to the previous estimates.

## 6 Conclusion

The Sargasso Sea (BATS) and the North Tropical Pacific Ocean (ALOHA) were until now the only two subtropical gyres where the Si cycle was fully investigated during time-series surveys. In this paper, we provide the first data from two cruises documenting production, biomass and export fluxes from the oligotrophic to ultra-oligotrophic conditions in the South Tropical Pacific Gyre, which may lower the estimates of diatom contribution to primary productivity and export fluxes for the Pacific Ocean and for mid-ocean gyres in general. The mid-ocean gyres (representing 1/3 of the global ocean) are severely under-sampled regarding the Si cycle, and may encompass very

different situations, in particular in the vicinity of Islands and archipelagos with reduced bathymetry, and nutrient-fertilized surface waters, to HNLC waters and even HNLSiLC along the equatorial divergence (Dugdale and Wilkerson, 1998). The mid-ocean gyres contribution to Si production was recently revised down to 5-7% of the total by Brzezinski et al. (2011) building on estimates from the North Subtropical Pacific Gyre. The present study points to even lower values for the South Pacific Gyre, confirming its ultra-oligotrophic nature, and should further decrease this estimate. These findings underscore the differences in functioning of different subtropical oligotrophic gyres between the North Atlantic, North Pacific and South Pacific and clearly warrant for improved coverage of these areas and for more complete elemental studies (from Si production to export).

Diatom community structure and contribution to total biomass could be summarized by differentiating 3 main ecosystems: (i) the eutrophic Peru-Chile coastal upwelling, where colonial neritic centric diatoms such as *Skeletonema* sp., *Chaetoceros* sp. and *Thalassiosira* sp. contributed to elevated abundances ( $>100,000$  cells  $L^{-1}$ ) and very high Si uptake rates; (ii) the HNLC region off the Marquesas Islands and the nutrient depleted but Fe-fertilized region of the Melanesian Archipelago, where a distinct community largely dominated by small and medium-sized pennates such as *Cylindrotheca closterium* and *Pseudo-nitzschia delicatissima* developed to moderate levels ( $<30,000$  cells  $L^{-1}$ ), while Fe levels in the MA further stimulated diazotrophs and DDAs which could have stimulated diatom growth through secondary N release; (iii) the SPG, characterized by ultra-oligotrophic conditions and Fe-limitation, where diatoms reached negligible abundances ( $<200$  cells  $L^{-1}$ ) with species typical of oligotrophic regions, such as *Nitzschia bicaudata*, *Mastogloia woodiana*, *Planktoniella sol* as well as radiolarians.

Finally, thanks to both size-fractionated biomass and Si uptake measurements, we were able to confirm a potential role for *Synechococcus* cells in Si uptake in all environments, which may be of importance relative to diatoms in oligotrophic regions, but probably negligible in highly productive regions such as coastal upwellings. Mechanisms linked to Si uptake in *Synechococcus* and its ecological function still need to be elucidated, and further attention to the Si cycle needs to be placed on this elusive pico- and nano-sized fraction.

## **7 Data availability**

All data is available upon request through both cruises databases, for BIOSOPE (<http://www.obs-vlfr.fr/proof/vt/op/ec/biosope/bio.htm>) and OUTPACE (<http://www.obs-vlfr.fr/proof/php/outpace/outpace.php>). For the Si stocks and flux data for the OUTPACE cruise, see <http://doi.org/10.17882/55743>. For the BIOSOPE cruise, see <http://doi.org/10.17882/55722>.

## **8 Author contribution**

KL treated all data and wrote the paper. BQ and PR sampled on board and analyzed Si data from the BIOSOPE cruise. SH-N and O.G. collected nutrient samples on board and analyzed nutrient data from the OUTPACE cruise. VC sampled for all BSi data and diatom diversity on board, and analyzed plankton net samples on the OUTPACE cruise. CB analyzed all Si data and ran diatom cell counts during her Masters thesis. HC and JR were in charge of all pigment data for both cruises. NL collected and analyzed Si export flux data from the OUTPACE drifting sediment traps.

## **9 Competing interests**

The authors declare that they have no conflict of interest.

## **10 Special Issue Statement**

This article is part of the special issue “Interactions between planktonic organisms and biogeochemical cycles across trophic and N<sub>2</sub> fixation gradients in the western tropical South Pacific Ocean: a multidisciplinary approach (OUTPACE experiment)”

## **11 Acknowledgments**

This work is part of the OUTPACE Experiment project (<https://outpace.mio.univ-amu.fr/>) funded by the Agence Nationale de la Recherche (grant ANR-14-CE01-0007-01), the LEFE-CyBER program (CNRS-INSU), the Institut de Recherche pour le Développement (IRD), the GOPS program (IRD) and the CNES (BC T23, ZBC 4500048836), and the European FEDER Fund under project 1166-39417). The OUTPACE cruise (<http://dx.doi.org/10.17600/15000900>) was managed by the MIO (OSU Institut Pytheas, AMU) from Marseilles (France). The BIOSOPE project was

funded by the Centre National de la Recherche Scientifique (CNRS), the Institut des Sciences de l'Univers (INSU), the Centre National d'Etudes Spatiales (CNES), the European Space Agency (ESA), The National Aeronautics and Space Administration (NASA) and the Natural Sciences and Engineering Research Council of Canada (NSERC). This is a contribution to the BIOSOPE project of the LEFE-CYBER program. The project leading to this publication has received funding from European FEDER Fund under project 1166-39417. We warmly thank the captain, crew and CTD operators on board R/V l'Atalante during both cruises. We further acknowledge Fernando Gomez for providing diatom cell counts during BIOSOPE, Dr. P. Raimbault and N. Garcia for nutrient analyses during BIOSOPE, Dr Jeremy Young at University College of London for allowing the use of Parmale image from the Nannotax website and Mathieu Caffin for providing a NanoSIMS image of *Synechococcus* collected during OUTPACE showing cellular Si accumulation.

## 12 References

- Adjou, M., Tréguer, P. J., Dumousseaud, C., Corvaisier, R., Brzezinski, M. A., and Nelson, D. M.: Particulate silica and Si recycling in the surface waters of the Eastern Equatorial Pacific, Deep-Sea Research Part II: Topical Studies in Oceanography, 58, 449-461, 2011.
- Aminot, A. and Kérouel, R.: Dosage automatique des nutriments dans les eaux marines: méthodes en flux continu, Editions Quae, 2007.
- Assmy, P., Henjes, J., Klaas, C., and Smetacek, V. S.: Mechanisms determining species dominance in a phytoplankton bloom induced by the iron fertilization experiment EisenEx in the Southern Ocean, Deep-Sea Research Part I: Oceanographic Research Papers, 54, 340-362, 2007.
- Avaria, S. and Munoz, P.: Effects of the 1982-1983 El Nino on the marine phytoplankton off Northern Chile, Journal of Geophysical Research, 92, 14,369-314,382, 1987.
- Baines, S. B., Twining, B. S., Brzezinski, M. A., Krause, J. W., Vogt, S., Assael, D., and McDaniel, H.: Significant silicon accumulation by marine picocyanobacteria, Nature Geoscience, 5, 886-891, 2012.
- Blain, S., Bonnet, S., and Guieu, C.: Dissolved iron distribution in the tropical and sub tropical South Eastern Pacific, Biogeosciences, 5, 269-280, 2008.
- Blain, S., Leynaert, A., Tréguer, P. J., Chrétiennot-Dinet, M.-J., and Rodier, M.: Biomass, growth rates and limitation of Equatorial Pacific diatoms, Deep Sea Research Part I: Oceanographic Research Papers, 44, 1255-1275, 1997.
- Bonnet, S., Berthelot, H., Turk-Kubo, K., Cornet-Barthaux, V., Fawcett, S., Berman-Frank, I., Barani, A., Grégori, G., Dekaezemacker, J., Benavides, M., and Capone, D. G.: Diazotroph derived nitrogen supports diatom growth in the South West Pacific: A quantitative study using nanoSIMS, Limnology and Oceanography, 61, 1549-1562, 2016.
- Bonnet, S., Caffin, M., Berthelot, H., and Moutin, T.: Hot spot of N<sub>2</sub> fixation in the western tropical South Pacific pleads for a spatial decoupling between N<sub>2</sub> fixation and denitrification, Proceedings of the National Academy of Sciences, 114, E2800-E2801, 2017.



714 Bonnet, S., Caffin, M., Berthelot, H., Grosso, O., Benavides, M., Hélias-Nunige, S., Guieu, C., Stenegren, M and  
715 Foster, R. A.: In depth characterization of diazotroph activity across the Western Tropical South Pacific hot spot of N<sub>2</sub>  
716 fixation, *Biogeosciences Discuss.*, 2018, 1 – 30, doi:10.5194/bg-2017-567, 2018.

717 Brzezinski, M. A., Dumousseaud, C., Krause, J. W., Measures, C. I., and Nelson, D. M.: Iron and silicic acid  
718 concentrations together regulate Si uptake in the equatorial Pacific Ocean, *Limnology and Oceanography*, 53, 875-  
719 889, 2008.

720 Brzezinski, M. A. and Kosman, C. A.: Silica production in the Sargasso Sea during spring 1989, *Marine Ecology*  
721 *Progress Series*, 142, 39-45, 1996.

722 Brzezinski, M. A., Krause, J. W., Baines, S. B., Collier, J. L., Ohnemus, D. C., and Twining, B. S.: Patterns and  
723 regulation of silicon accumulation in *Synechococcus* spp., *Journal of Phycology*, 53, 746-761, 2017.

724 Brzezinski, M. A., Krause, J. W., Church, M. J., Karl, D. M., Li, B., Jones, J. L., and Updyke, B.: The annual silica  
725 cycle of the North Pacific subtropical gyre, *Deep-Sea Research Part I: Oceanographic Research Papers*, 58, 988-1001,  
726 2011.

727 Brzezinski, M. A. and Nelson, D. M.: The annual silica cycle in the Sargasso Sea near Bermuda, *Deep-Sea Research*  
728 *Part I*, 42, 1215-1237, 1995.

729 Brzezinski, M. A. and Nelson, D. M.: Seasonal changes in the silicon cycle within a Gulf Stream warm-core ring, *Deep*  
730 *Sea Research Part A. Oceanographic Research Papers*, 36, 1009-1030, 1989.

731 Brzezinski, M. A., Phillips, D. R., Chavez, F. P., Friederich, G. E., and Dugdale, R. C.: Silica production in the  
732 Monterey, California, upwelling system, *Limnology and Oceanography*, 42, 1694-1705, 1997.

733 Brzezinski, M. A., Villareal, T. A., and Lipschultz, F. F.: Silica production and the contribution of diatoms to new and  
734 primary production in the central North Pacific, *Marine Ecology-Progress Series*, 167, 89-104, 1998.

735 Buck, K. R. and Chavez, F. P.: Diatom aggregates from the open ocean, *Journal of Plankton Research*, 16, 1449-1457,  
736 1994.

737 Caffin, M., Berthelot, H., Cornet-Barthaux, V., and Bonnet, S.: Transfer of diazotroph-derived nitrogen to the  
738 planktonic food web across gradients of N<sub>2</sub> fixation activity and diversity in the Western Tropical South Pacific,  
739 *Biogeosciences Discuss.*, 2018, 1-32, 2018.

740 Calil, P. H. R., Doney, S. C., Yumimoto, K., Eguchi, K. and Takemura, T.: Episodic upwelling and dust deposition as  
741 bloom triggers in low-nutrient, low-chlorophyll regions, *J. Geophys. Res. Ocean.*, 116(6), 1–16,  
742 doi:10.1029/2010JC006704, 2011.

743

744 Carlotti, F., Pagano, M., Guilloux, L., Donoso, K., Valdés, V., and Hunt, B. P. V.: Mesozooplankton structure and  
745 functioning in the western tropical South Pacific along the 20° parallel south during the OUTPACE survey (February-  
746 April 2015), *Biogeosciences Discuss.*, 2018, 1-51, 2018.

747 Carpenter, E. J.: *Marine Cyanobacterial Symbioses*, 102B, 15-18, 2002.

748 Chavez, F. P., Buck, K. R., and Barber, R. T.: Phytoplankton taxa in relation to primary production in the equatorial  
749 Pacific, *Deep Sea Research Part A. Oceanographic Research Papers*, 37, 1733-1752, 1990.

750 Chavez, F. P., Buck, K. R., Coale, K. H., Martin, J. H., DiTullio, G. R., Welschmeyer, N. A., Jacobson, A. C., and  
751 Barber, R. T.: Growth rates, grazing, sinking, and iron limitation of equatorial Pacific phytoplankton, *Limnology and*  
752 *Oceanography*, 36, 1816-1833, 1991.

753 Chavez, F. P., Buck, K. R., Service, S. K., Newton, J., and Barber, R. T.: Phytoplankton variability in the central and  
754 eastern tropical Pacific, *Deep-Sea Research Part II-Topical Studies in Oceanography*, 43, 835-+, 1996.

755 Chisholm, S. W.: Phytoplankton Size, doi: 10.1007/978-1-4899-0762-2\_12, 1992. 213-237, 1992.

756 Claustre, H., Sciandra, A., and Vaultot, D.: Introduction to the special section bio-optical and biogeochemical  
757 conditions in the South East Pacific in late 2004: The BIOSOPE program, *Biogeosciences*, 5, 679-691, 2008.

758 Crombet, Y., Leblanc, K., Quéguiner, B., Moutin, T., Rimmelin, P., Ras, J., Claustre, H., Leblond, N., Oriol, L., and  
759 Pujo-Pay, M.: Deep silicon maxima in the stratified oligotrophic Mediterranean Sea, *Biogeosciences*, 8, 459-475, 2011.

760 de Verneil, A., Rousselet, L., Doglioli, A. M., Petrenko, A. A., Maes, C., Bouruet-Aubertot, P., and Moutin, T.:  
761 OUTPACE long duration stations: physical variability, context of biogeochemical sampling, and evaluation of  
762 sampling strategy, *Biogeosciences*, 15, 2125-2147, 2018.

763 Demarest, M. S., Brzezinski, M. A., Nelson, D. M., Krause, J. W., Jones, J. L., and Beucher, C. P.: Net biogenic silica  
764 production and nitrate regeneration determine the strength of the silica pump in the Eastern Equatorial Pacific, *Deep-  
765 Sea Research Part II: Topical Studies in Oceanography*, 58, 462-476, 2011.

766 Devassy, V. P., Bhattathiri, P. M. A., and Qasim, S. Z.: Trichodesmium phenomenon, *Indian J. Mar. Sci.*, 7, 168-186,  
767 1978.

768 Dore, J. E., Letelier, R. M., Church, M. J., Lukas, R., and Karl, D. M.: Summer phytoplankton blooms in the  
769 oligotrophic North Pacific Subtropical Gyre: Historical perspective and recent observations, *Progress in  
770 Oceanography*, 76, 2-38, 2008.

771 Dugdale, R. C. and Wilkerson, F. P.: Silicate regulation of new production in the equatorial Pacific upwelling, *Nature*,  
772 391, 270-273, 1998.

773 Fryxell, G. A. and Kaczmarek, I.: Specific variability in Fe-enriched cultures from the equatorial Pacific, *Journal of  
774 plankton research*, 16, 755-769, 1994.

775 Fumenia, A., Moutin, T., Bonnet, S., Benavides, M., Petrenko, A., Helias Nunige, S., and Maes, C.: Excess nitrogen  
776 as a marker of intense dinitrogen fixation in the Western Tropical South Pacific Ocean: impact on the thermocline  
777 waters of the South Pacific, *Biogeosciences Discuss.*, 2018, 1-33, 2018.

778 Gomez, F., Claustre, H., Raimbault, P., and Souissi, S.: Two High-Nutrient Low-Chlorophyll phytoplankton  
779 assemblages: the tropical central Pacific and the offshore Peru -Chile Current, *Biogeosciences*, 4, 1101-1113, 2007.

780 Grob, C., Ulloa, O., Claustre, H., Huot, Y., Alarcón, G., and Marie, D.: Contribution of picoplankton to the total  
781 particulate organic carbon concentration in the eastern South Pacific, *Biogeosciences*, 4, 837-852, 2007.

782 Guieu, C., Bonnet, S., Petrenko, A., Menkes, C., Chavagnac, V., Desboeufs, K., and Moutin, T.: Iron from a submarine  
783 source impacts the productive layer of the Western Tropical South Pacific (WTSP), *Nature Sci. Rep.*, in rev. in rev.

784 Guillard, R. R. L. and Kilham, P.: The ecology of marine planktonic diatoms, 13, 372-469, 1977.

785 Hasle, G. R.: Phytoplankton and ciliate species from the tropical Pacific, 1960. 1960.

786 Honjo, S. and Manganini, S. J.: Annual biogenic particle fluxes to the interior of the North Atlantic Ocean; studied at  
787 34°N 21°W and 48°N 21°W, *Deep-Sea Research Part II*, 40, 587-607, 1993.

788 Ichinomiya, M. a.: Diversity and oceanic distribution of the Parmales (Bolidophyceae), a picoplanktonic group closely  
789 related to diatoms, *ISME Journal*, 10, 2419-2434, 2016.

790 Iriarte, J. L. and Fryxell, G. A.: Micro-phytoplankton at the equatorial Pacific (140°W) during the JGOFS EqPac Time  
791 Series studies: March to April and October 1992, Deep-Sea Research Part II, 42, 559-583, 1995.

792 Jimenez, R.: Composition and distribution of phytoplankton in the upwelling system of the Galapagos Islands, Coastal  
793 and Estuarine Sciences, 1, 39-43, 1981.

794 Kaczmarek, I. and Fryxell, G. A.: Micro-phytoplankton of the equatorial Pacific: 140°W meridional transect during  
795 the 1992 El Niño, Deep-Sea Research Part II, 42, 535-558, 1995.

796 Kobayashi, F. and Takahashi, K.: Distribution of diatoms along the equatorial transect in the western and central Pacific  
797 during the 1999 La Niña conditions, Deep-Sea Research Part II: Topical Studies in Oceanography, 49, 2801-2821,  
798 2002.

799 Krause, J. W., Brzezinski, M. A., Baines, S. B., Collier, J. L., Twining, B. S., and Ohnemus, D. C.: Picoplankton  
800 contribution to biogenic silica stocks and production rates in the Sargasso Sea, Global Biogeochemical Cycles,  
801 Accepted, 1-13, 2017.

802 Krause, J. W., Brzezinski, M. A., Goericke, R., Landry, M. R., Ohman, M. D., Stukel, M. R., and Taylor, A. G.:  
803 Variability in diatom contributions to biomass, organic matter production and export across a frontal gradient in the  
804 California Current Ecosystem, Journal of Geophysical Research: Oceans, 120, 1032-1047, 2015.

805 Krause, J. W., Brzezinski, M. A., Villareal, T. A., and Wilson, C.: Biogenic silica cycling during summer  
806 phytoplankton blooms in the North Pacific subtropical gyre, Deep-Sea Research Part I: Oceanographic Research  
807 Papers, 71, 49-60, 2013.

808 Krause, J. W., Nelson, D. M., and Brzezinski, M. A.: Biogenic silica production and the diatom contribution to primary  
809 production and nitrate uptake in the eastern equatorial Pacific Ocean, Deep-Sea Research Part II: Topical Studies in  
810 Oceanography, 58, 434-448, 2011.

811 Krause, J. W., Nelson, D. M., and Lomas, M. W.: Biogeochemical responses to late-winter storms in the Sargasso Sea,  
812 II: Increased rates of biogenic silica production and export, Deep-Sea Research Part I: Oceanographic Research Papers,  
813 56, 861-874, 2009.

814 Krause, J. W., Nelson, D. M., and Lomas, M. W.: Production, dissolution, accumulation, and potential export of  
815 biogenic silica in a Sargasso Sea mode-water eddy, Limnology and Oceanography, 55, 569-579, 2010.

816 Leblanc, K., Cornet, V., Caffin, M., Rodier, M., Desnues, A., Berthelot, H., Turk-Kubo, K., and Heliou, J.:  
817 Phytoplankton community structure in the VAHINE mesocosm experiment, Biogeosciences, 13, 5205-5219, 2016.

818 Leblanc, K., Hare, C. E., Boyd, P. W., Bruland, K. W., Sohst, B., Pickmere, S., Lohan, M. C., Buck, K. N., Ellwood,  
819 M. J., and Hutchins, D. A.: Fe and Zn effects on the Si cycle and diatom community structure in two contrasting high  
820 and low-silicate HNLC areas, Deep-Sea Research Part I: Oceanographic Research Papers, 52, 1842-1864, 2005a.

821 Leblanc, K., Leynaert, A., Fernandez, C. I., Rimmelin, P., Moutin, P., Raimbault, P., Ras, J., and Quéguiner, B.: A  
822 seasonal study of diatom dynamics in the North Atlantic during the POMME experiment (2001): Evidence for Si  
823 limitation of the spring bloom, Journal of Geophysical Research, 110, C07S14, 2005b.

824 Leblanc, K., Quéguiner, B., Diaz, F., Cornet, V., Michel-Rodriguez, M., Durrieu de Madron, X., Bowler, C., Malviya,  
825 S., Thyssen, M., Grégori, G., Rembauville, M., Grosso, O., Poulain, J., de Vargas, C., Pujo-Pay, M., and Conan, P.:  
826 Nanoplanktonic diatoms are globally overlooked but play a role in spring blooms and carbon export, Nature  
827 Communications, 9, 953, 2018.

828 Leblanc, K., Quéguiner, B., Garcia, N., Rimmelin, P., and Raimbault, P.: Silicon cycle in the NW Mediterranean Sea:  
829 Seasonal study of a coastal oligotrophic site, Oceanologica Acta, 26, 339-355, 2003.

830 Leblanc, K., Arístegui, J., Armand, L., Assmy, P., Beker, B., Bode, A., Breton, E., Cornet, V., Gibson, J., Gosselin,  
831 M.-P., Kopczynska, E., Marshall, H., Peloquin, J., Piontkovski, S., Poulton, a. J., Quéguiner, B., Schiebel, R., Shipe,  
832 R., Stefels, J., van Leeuwe, M. a., Varela, M., Widdicombe, C. and Yallop, M.: A global diatom database – abundance,  
833 biovolume and biomass in the world ocean, *Earth Syst. Sci. Data*, 4, 149–165, doi:10.5194/essdd-5-147-2012, 2012.

834 Leynaert, A.: La production de silice biogénique dans l'océan : de la mer de Weddell à l'océan Antarctique., 1993. 99,  
835 1993.

836 Leynaert, A., Trguer, P. J., Lancelot, C., and Rodier, M.: Silicon limitation of biogenic silica production in the  
837 Equatorial Pacific, *Deep-Sea Research Part I: Oceanographic Research Papers*, 48, 639-660, 2001.

838 Mosseri, J., Quéguiner, B., Rimmelin, P., Leblond, N., and Guieu, C.: Silica fluxes in the northeast Atlantic frontal  
839 zone of Mode Water formation (38–45 N, 16–22 W) in 2001–2002, *Journal of Geophysical Research: Oceans*, 110,  
840 2005.

841 Moutin, T., Karl, D. M., Duhamel, S., Rimmelin, P., Raimbault, P., Van Mooy, B. A. S., and Claustre, H.: Phosphate  
842 availability and the ultimate control of new nitrogen input by nitrogen fixation in the tropical Pacific Ocean,  
843 *Biogeosciences*, 5, 95-109, 2008.

844 Moutin, T., Doglioli, A. M., de Verneil, A., and Bonnet, S.: Preface: The Oligotrophy to the ULtra-oligotrophy PACific  
845 Experiment (OUTPACE cruise, 18 February to 3 April 2015), *Biogeosciences*, 14, 3207-3220, 2017.

846 Moutin, T., Wagener, T., Caffin, M., Fumenia, A., Gimenez, A., Baklouti, M., Bouruet-Aubertot, P., Pujo-Pay, M.,  
847 Leblanc, K., Lefevre, D., Helias Nunige, S., Leblond, N., Grosso, O., and de Verneil, A.: Nutrient availability and the  
848 ultimate control of the biological carbon pump in the Western Tropical South Pacific Ocean, *Biogeosciences Discuss.*,  
849 2018, 1-41, 2018.

850 Nelson, D., Goering, J., and Boisseau, D.: Consumption and regeneration of silicic acid in three coastal upwelling  
851 systems, *Coastal upwelling*, 1981. 242-256, 1981.

852 Nelson, D. M. and Brzezinski, M. A.: Diatom growth and productivity in an oligo-trophic midocean gyre: A 3-yr  
853 record from the Sargasso Sea near Bermuda, *Limnology and Oceanography*, 42, 473-486, 1997.

854 Nelson, D. M. and Goering, J. J.: Assimilation of silicic acid by phytoplankton in the Baja California and northwest  
855 Africa upwelling systems, *Limnology and Oceanography*, 23, 508-517, 1978.

856 Nelson, D. M., Smith, W. O., Muench, R. D., Gordon, L. I., Sullivan, C. W., and Husby, D. M.: Particulate matter and  
857 nutrient distributions in the ice-edge zone of the Weddell Sea: relationship to hydrography during late summer, *Deep  
858 Sea Research Part A. Oceanographic Research Papers*, 36, 191-209, 1989.

859 Nelson, D. M., Tréguer, P. J., Brzezinski, M. A., Leynaert, A., and Quéguiner, B.: Production and dissolution of  
860 biogenic silica in the ocean: Revised global estimates, comparison with regional data and relationship to biogenic  
861 sedimentation, *Global Biogeochemical Cycles*, 9, 359-372, 1995.

862 Ohnemus, D. C., Rauschenberg, S., Krause, J. W., Brzezinski, M. A., Collier, J. L., Geraci-Yee, S., Baines, S. B., and  
863 Twining, B. S.: Silicon content of individual cells of *Synechococcus* from the North Atlantic Ocean, *Marine Chemistry*,  
864 187, 16-24, 2016.

865 Paasche, E.: Silicon and the ecology of marine plankton diatoms. I. *Thalassiosira pseudonana* (*Cyclotella nana*) grown  
866 in a chemostat with silicate as limiting nutrient., *Marine Biology*, 19, 117-126, 1973.

867 Quéguiner, B.: Iron fertilization and the structure of planktonic communities in high nutrient regions of the Southern  
868 Ocean, *Deep Sea Research Part II: Topical Studies in Oceanography*, 90, 43-54, 2013.

869 Ragueneau, O. and Tréguer, P. J.: Determination of biogenic silica in coastal waters: applicability and limits of the  
870 alkaline digestion method, *Marine Chemistry*, 45, 43-51, 1994.

871 Ragueneau, O., Tréguer, P. J., Leynaert, A., Anderson, R. F., Brzezinski, M. A., DeMaster, D. J., Dugdale, R. C.,  
872 Dymond, J., Fischer, G., Franois, R., Heinze, C., Maier-Reimer, E., Martin-Jézéquel, V., Nelson, D. M., and  
873 Quéguiner, B.: A review of the Si cycle in the modern ocean: recent progress and missing gaps in the application of  
874 biogenic opal as a paleoproductivity proxy, *Global and Planetary Change*, 26, 317-365, 2000.

875 Raimbault, P., Garcia, N., and Cerutti, F.: Distribution of inorganic and organic nutrients in the South Pacific Ocean  
876 &minus; evidence for long-term accumulation of organic matter in nitrogen-depleted waters, *Biogeosciences*, 5, 281-  
877 298, 2008.

878 Ras, J., Claustre, H., and Uitz, J.: Spatial variability of phytoplankton pigment distributions in the Subtropical South  
879 Pacific Ocean: comparison between in situ and predicted data, *Biogeosciences Discussions*, 4, 3409-3451, 2008.

880 Rivera, P., Herrera, L., and Barrales, H.: Report of two species of *Thalassiosira* (Bacillariophyceae): *T. rotula* Meunier  
881 and *T. anguste-lineata* (A. Schmidt) Fryxell et Hasle, as new to northern Chile, *Cryptogamie. Algologie*, 17, 123-130,  
882 1996.

883 Semina, H. J. and Levashova, S. S.: the Biogeography of Tropical Phytoplankton Species in the Pacific-Ocean,  
884 *Internationale Revue Der Gesamten Hydrobiologie*, 78, 243-262, 1993.

885 Shipe, R. F., Brzezinski, M. A., Pilskaln, C. and Villareal, T. A.: Rhizosolenia mats: An overlooked source of silica  
886 production in the open sea, *Limnol. Oceanogr.*, 44(5), 1282-1292, 1999.

887 Stenegren, M., Caputo, A., Berg, C., Bonnet, S., and Foster, R. A.: Distribution and drivers of symbiotic and free-  
888 living diazotrophic cyanobacteria in the western tropical South Pacific, *Biogeosciences*, 15, 1559-1578, 2018.

889 Strickland, J. D. H. and Parsons, T. R.: A practical handbook of seawater analysis, Fisheries Research Board of Canada  
890 Bulletin, 167, 310, 1972.

891 Tréguer, P. J. and De la Rocha, C. L.: The world ocean silica cycle., *Annual review of marine science*, 5, 477-501,  
892 2013.

893 Tréguer, P. J. and Lindner, L.: Production of biogenic silica in the Weddell-Scotia Seas measured with  $^{32}\text{Si}$ , *Limnology*  
894 *and Oceanography*, 36, 1217-1227, 1991.

895 Villareal, T. A., Adornato, L., Wilson, C., and Schoenbaechler, C. A.: Summer blooms of diatom-diazotroph  
896 assemblages and surface chlorophyll in the North Pacific gyre: A disconnect, *Journal of Geophysical Research*, 116,  
897 C03001, 2011.

898 Wilson, C.: Chlorophyll anomalies along the critical latitude at 30N in the NE Pacific, *Geophysical Research Letters*,  
899 38, 1-6, 2011.

900 Wilson, C.: Late summer chlorophyll blooms in the oligotrophic North Pacific Subtropical Gyre, *Geophysical*  
901 *Research Letters*, 30, 4-7, 2003.

902 Wong, C. S. and Matear, R. J.: Sporadic silicate limitation of phytoplankton productivity in the subarctic NE Pacific,  
903 *Deep-Sea Research Part II: Topical Studies in Oceanography*, 46, 2539-2555, 1999.

904

905

906

907

908

909

### 13 Figure Legend

**Figure 1:** Bathymetric map of the stations sampled in the South Pacific Ocean during the OUTPACE cruise (Feb.-Apr. 2015) and the BIOSOPE cruise (Oct.-Nov. 2004). Short-term duration stations are indicated in white, and long-term duration stations (typically 2-3d) in black.

**Figure 2:** Nutrient distribution (a. orthosilicic acid, b. nitrate, c. phosphate, in  $\mu\text{M}$ ) along the OUTPACE cruise transect and potential density (in  $\text{kg m}^{-3}$ ) as white isolines overlay.

**Figure 3:** Nutrient distribution (a. orthosilicic acid, b. nitrate, c. phosphate, in  $\mu\text{M}$ ) along the BIOSOPE cruise transect and potential density (in  $\text{kg m}^{-3}$ ) as white isolines overlay.

**Figure 4 :** a. TChla distribution during the OUTPACE cruise in the SW Pacific (in  $\mu\text{g L}^{-1}$ ) with fucoxanthin overlay lines in white (in  $\text{ng L}^{-1}$ ). b. TChla distribution during the BIOSOPE cruise in the SW Pacific (in  $\mu\text{g L}^{-1}$ ) with fucoxanthin overlay lines in white (in  $\text{ng L}^{-1}$ ). Black dots indicated the Ze depth.

**Figure 5:** a.c Biogenic silica (BSi) and b.d. Lithogenic Silica (LSi) distribution during the OUTPACE and BIOSOPE cruises respectively (in  $\mu\text{mol L}^{-1}$ ).

**Figure 6:** a.b Size-fractionated integrated Biogenic silica ( $\Sigma\text{BSi}$ ) standing stocks (0-125 m) during the BIOSOPE cruise. UPW1 stations was only integrated over 50 m and UPX1 and UPX2 over 100 m. The b panel shows a zoom over the central section where integrated BSi stocks are an order of magnitude lower than at the two extremities of the transect. Grey bars indicate that no size-fractionation was conducted and represent the total  $\Sigma\text{BSi}$ . C. Size-fractionated integrated Biogenic silica ( $\Sigma\text{BSi}$ ) standing stocks (0-125 m) during the OUTPACE cruise.

**Figure 7:** a. Total absolute Si uptake rates ( $\rho\text{Si}$ ) vertical profiles (in  $\mu\text{mol L}^{-1} \text{d}^{-1}$ ) at the LD stations MAR, HNL, GYR, EGY, UPX and UPW. b.  $\rho\text{Si}$  in the 0.2 - 2  $\mu\text{m}$  size fraction at the same sites. X-axis is in log scale to better show low production profile.

**Figure 8:** Diatom doubling times  $k$  (in  $\text{d}^{-1}$ ) as tukey box-plot of all data available per vertical profile for each station of the BIOSOPE cruise.

**Figure 9:** Diatoms cellular concentrations (cells  $\text{L}^{-1}$ ) derived from a. Niskin cell counts, b. number of taxa and c. relative contribution to POC biomass (%) at the surface and DCM levels during the OUTPACE cruise.

**Figure 10:** Diatoms cellular concentrations (cells  $\text{L}^{-1}$ ) derived from Niskin cell counts at several depths during the BIOSOPE cruise (data from Gomez et al. 2007).

**Figure 11:** Potential siliceous organisms in the picoplanktonic (<2-3  $\mu\text{m}$ ) size fraction. a. Siliceous scale-bearing *Parmale* (*Tetraparma pelagica* in SEM, photo courtesy of Dr. J. Young), b. centric diatom (*Minidiscus trioculatus*), c. *Synechococcus* cell showing Si assimilation in red ( $^{28}\text{Si}$ ) in NanoSIMS (photo courtesy of M. Caffin).

## 14 Tables

**Table 1: Size-fractionated integrated Si production rates in mmol Si m<sup>-2</sup> d<sup>-1</sup> in the SEP (BIO SOPE). Integrated Si production was measured over the 0-1% light depth range for each site (in parenthesis in column 5), and normalized over 100 m considering a zero production at 100 m in the last column.**

| Stations | ΣρSi <2μm | ΣρSi 2-10 μm | ΣρSi >10μm | Total ΣρSi   | Total ΣρSi over 0-100 m |
|----------|-----------|--------------|------------|--------------|-------------------------|
| MAR1     | 0.15      | 0.51         | 4.37       | 5.02 (50 m)  | 5.87                    |
| HNL1     | 0.05      | 0.12         | 0.58       | 0.75 (80 m)  | 0.77                    |
| GYR2     | 0.01      | 0.01         | 0.02       | 0.04 (110 m) | 0.04                    |
| EGY      | 0.03      | 0.07         | 0.09       | 0.19 (100 m) | 0.19                    |
| UPW2     | 0.62      | 2.88         | 39.66      | 43.16 (35 m) | 52.36                   |
| UPX1     | 1.07      | 5.90         | 13.49      | 20.46 (30 m) | 42.46                   |

**Table 2: Dominant diatom species in each main system of the BIO SOPE and OUTPACE cruises. Taxonomic information for the OUTPACE cruise are derived from discrete samplings at the surface and DCM and phytoplankton nets, while information for the BIO SOPE cruise were obtained through an average of six discrete samples over the euphotic layer (see Gomez et al., 2007).**

| Cruise   | Oceanic system                | Dominant diatom species                                                                                                                                                                                                                                                                                                                                                 |
|----------|-------------------------------|-------------------------------------------------------------------------------------------------------------------------------------------------------------------------------------------------------------------------------------------------------------------------------------------------------------------------------------------------------------------------|
| OUTPACE  | Melanesian Archipelago        | <i>Pseudo-nitzschia</i> spp. & <i>Pseudo-nitzschia delicatissima</i> ,<br><i>Cylindrotheca closterium</i> , <i>Mastogloia woodiana</i> ,<br><i>Leptocylindrus mediterraneus</i> , <i>Hemiaulus membranaceus</i> ,<br><i>Chaetoceros</i> spp. ( <i>hyalochaete</i> ), <i>Pseudosolenia calcaravis</i> ,<br><i>Climacodium frauenfeldianum</i> , <i>Planktoniella sol</i> |
|          | South Pacific Gyre            | <i>Climacodium frauenfeldianum</i> , <i>Pseudo-nitzschia</i> spp.,<br><i>Chaetoceros</i> spp. ( <i>hyalochaete</i> ), <i>Pseudo-nitzschia delicatissima</i> ,<br><i>Mastogloia woodiana</i>                                                                                                                                                                             |
| BIO SOPE | Western HNLC area (Marquesas) | <i>Pseudo-nitzschia delicatissima</i> , <i>Rhizosolenia bergonii</i> ,<br><i>Thalassiothrix longissima</i> , <i>Plagiotropis</i> spp., <i>Pseudo-nitzschia pungens</i> , <i>P. subpacific</i>                                                                                                                                                                           |
|          | South Tropical Pacific        | <i>Nitzschia bicapitata</i> species complex, <i>Nitzschia</i> sp.,<br><i>Thalassiothrix longissima</i> , <i>Pseudo-nitzschia delicatissima</i>                                                                                                                                                                                                                          |
|          | South Pacific Gyre            | <i>Hemiaulus hauckii</i> , <i>Chaetoceros curvisetus</i> , <i>Bacteriastrum</i> cf. <i>comosum</i>                                                                                                                                                                                                                                                                      |
|          | Eastern Gyre                  | <i>Pseudo-nitzschia</i> cf. <i>delicatissima</i> , <i>Pseudo-nitzschia</i> cf. <i>subpacific</i> , <i>Pseudoeunotia</i> sp.                                                                                                                                                                                                                                             |
|          | Peru-Chile Upwelling          | <i>Chaetoceros compressus</i> , <i>Bacteriastrum</i> sp., <i>Thalassiosira subtilis</i> ,<br><i>Chaetoceros</i> cf. <i>diadema</i> , <i>Skeletonema</i> sp., <i>Pseudo-nitzschia</i> sp.                                                                                                                                                                                |



**Table 3: Particulate biogenic and lithogenic (BSi and LSi) Silica in drifting sediment traps at each long duration station during OUTPACE cruise, at 153, 328 and 519 m depth.**

|          | Trap depth<br>m | BSi<br>$\mu\text{mol Si m}^{-2} \text{ d}^{-1}$ | LSi<br>$\mu\text{mol Si m}^{-2} \text{ d}^{-1}$ |
|----------|-----------------|-------------------------------------------------|-------------------------------------------------|
| <b>A</b> | 153             | 0.5                                             | 23.1                                            |
|          | 328             | 0.2                                             | 4.6                                             |
|          | 519             | 0.1                                             | 5.2                                             |
| <b>B</b> | 153             | 2.6                                             | 0.4                                             |
|          | 328             | 2.9                                             | 0.6                                             |
|          | 519             | 4.8                                             | 1.1                                             |
| <b>C</b> | 153             | 1.8                                             | 0.5                                             |
|          | 328             | 0.5                                             | 0.2                                             |

**Table 4: Integrated Si production rates in various systems for comparison with our study from direct  $^{32}\text{Si}$  uptake measurements or from indirect silicate utilization ( $\Delta \text{SiO}_4$ ) estimates (\*).**

| Region                                     | Integrated Si production<br>rate<br>$\Sigma \rho \text{ Si (mmol m}^{-2} \text{ d}^{-1})$ | References                                                                              |
|--------------------------------------------|-------------------------------------------------------------------------------------------|-----------------------------------------------------------------------------------------|
| <b>Coastal upwellings</b>                  |                                                                                           |                                                                                         |
| BIOCOPE: Peru-Chile upwelling              | <b>42 – 52 (UPW)</b>                                                                      | <i>This study</i>                                                                       |
| Baja California                            | 89                                                                                        | Nelson and Goering, 1978                                                                |
| Monterey Bay                               | 70                                                                                        | Brzezinski et al., 1997                                                                 |
| Peru                                       | 27                                                                                        | Nelson et al., 1981                                                                     |
| Southern California Current coastal waters | 1.7 – 5.6                                                                                 | Krause et al., 2015                                                                     |
| <b>Oceanic area</b>                        |                                                                                           |                                                                                         |
| BIOCOPE: South Eastern Pacific (HNLC)      | <b>0.8 – 5.6 (HNL – MAR)</b>                                                              | <i>This study</i>                                                                       |
| Gulf Stream warm rings                     | 6.4                                                                                       | Brzezinski and Nelson, 1989                                                             |
| Central Equatorial Pacific (HNLC)          | 3.9                                                                                       | Blain et al., 1997                                                                      |
| North Pacific (OSP)                        | 5.1                                                                                       | Wong and Matear, 1999*                                                                  |
| North Atlantic (POMME)                     | 1.7                                                                                       | Leblanc et al., 2005b                                                                   |
| North Atlantic (Bengal)                    | 0.9                                                                                       | Ragueneau et al., 2000                                                                  |
| Mediterranean Sea (SOFI)                   | 0.8                                                                                       | Leblanc et al., 2003                                                                    |
| <b>Oligotrophic area</b>                   |                                                                                           |                                                                                         |
| BIOCOPE: South Eastern Pacific Gyre        | <b>0.04 (GYR) – 0.2 (EGY)</b>                                                             | <i>This study</i>                                                                       |
| Central Equatorial Pacific                 | 0.8 – 2.1                                                                                 | Blain et al., 1997                                                                      |
| Eastern Equatorial Pacific                 | 0.2 – 2.5                                                                                 | Leynaert et al., 2001 ; Adjou et al., 2011 ; Krause et al., 2011, Demarest et al., 2011 |
| Central North Pacific                      | 0.5 – 2.9                                                                                 | Brzezinski et al., 1998                                                                 |
| North Pacific Subtropical Gyre             | 0.1 – 1.7                                                                                 | Krause et al., 2013                                                                     |
| North Pacific Subtropical Gyre (ALOHA)     | 0.1 – 0.5                                                                                 | Brzezinski et al., 2011                                                                 |
| Sargasso Sea                               | 0.5                                                                                       | Brzezinski and Nelson, 1995                                                             |
| Sargasso Sea (BATS)                        | 0.1 – 0.9                                                                                 | Brzezinski and Kosman, 1996 (1996), Nelson and Brzezinski, 1997                         |

**Table 5: Summary of  $\Sigma$ BSi stocks in mmol Si m<sup>-2</sup> for the OUTPACE and BIOSOPE and other oceanic and oligotrophic systems.**

| Region                                     | Average Integrated<br>Si biomass<br>$\Sigma \rho$ Si (mmol m <sup>-2</sup> ) | References              |
|--------------------------------------------|------------------------------------------------------------------------------|-------------------------|
| <b>Coastal upwellings</b>                  |                                                                              |                         |
| BIOSOPE: Peru-Chile upwelling              | <b>65.7 ± 53.8</b>                                                           | <i>This study</i>       |
| Southern California Current coastal waters | 53.2 ± 39.3                                                                  | Krause et al., 2015     |
| <b>Oceanic area</b>                        |                                                                              |                         |
| Southern California Current oceanic waters | 1.6 ± 0.3                                                                    | Krause et al., 2015     |
| BIOSOPE: South Eastern Pacific (HNLC)      | <b>11.9 ± 10.9</b>                                                           | <i>This study</i>       |
| <b>Oligotrophic area</b>                   |                                                                              |                         |
| Mediterranean Sea (BOUM)                   | 1.1 – 28.2                                                                   | Crombet et al., 2011    |
| Sargasso Sea (BATS)                        | 4.0 ± 6.8                                                                    | Nelson et al., 1995     |
| Sargasso Sea                               | 0.9 – 6.1                                                                    | Krause et al., 2017     |
| North Pacific Subtropical Gyre             | 1.6 – 12.8                                                                   | Krause et al., 2013     |
| North Pacific Subtropical Gyre (ALOHA)     | 3.0 ± 1.1                                                                    | Brzezinski et al., 2011 |
| Central North Pacific                      | 7.1 ± 3.0                                                                    | Brzezinski et al., 1998 |
| Eastern Equatorial Pacific                 | 3.8 – 18.0                                                                   | Krause et al., 2011     |
| BIOSOPE: South Eastern Pacific Gyre        | <b>1.1 ± 1.1</b>                                                             | <i>This study</i>       |
| OUTPACE: South Western Pacific Gyre        | <b>1.0 ± 0.2</b>                                                             | <i>This study</i>       |
| OUTPACE: Melanesian Archipelago            | <b>2.4 ± 1.0</b>                                                             | <i>This study</i>       |

984

985 **Table 6: Summary of Si export fluxes in sediment traps at various depths in  $\mu\text{mol Si m}^{-2} \text{ d}^{-1}$**   
 986 **for the OUTPACE cruise compared to other studies.**

| Region                                     | Sediment trap depth (m) | Average Si export fluxes ( $\mu\text{mol m}^{-2} \text{ d}^{-1}$ ) | References                                   |
|--------------------------------------------|-------------------------|--------------------------------------------------------------------|----------------------------------------------|
| <b>Coastal upwellings</b>                  |                         |                                                                    |                                              |
| Southern California Current coastal waters | 100                     | $8,000 \pm 5,760$                                                  | Krause et al., 2015                          |
| <b>Oceanic area</b>                        |                         |                                                                    |                                              |
| North Atlantic (NABE)                      | 400                     | 10 – 145                                                           | Honjo and Manganini, 1993                    |
| North Atlantic (POMME)                     | 400                     | 2 - 316                                                            | Mosseri et al., 2005 ; Leblanc et al., 2005b |
| North Pacific Subtropical Gyre (ALOHA)     | 150                     | 14 - 300                                                           | Brzezinski et al., 2011                      |
| <b>Oligotrophic area</b>                   |                         |                                                                    |                                              |
| Sargasso Sea (BATS)                        | 150                     | 17 - 700                                                           | Nelson et al., 1995                          |
| Sargasso Sea (BATS)                        | 150                     | 130                                                                | Brzezinski and Nelson, 1995                  |
|                                            | 200                     | 113                                                                |                                              |
|                                            | 300                     | 85                                                                 |                                              |
| OUTPACE: South Western Pacific Gyre        | 153                     | <b>1.8</b>                                                         | <b><i>This study</i></b>                     |
|                                            | 328                     | <b>0.5</b>                                                         |                                              |
| OUTPACE: Melanesian Archipelago            | 153                     | <b>1.6</b>                                                         | <b><i>This study</i></b>                     |
|                                            | 328                     | <b>1.6</b>                                                         |                                              |
|                                            | 519                     | <b>2.5</b>                                                         |                                              |

987

988

989 **15 Appendices**

| Stations | $\Sigma\text{BSi } 0.2\text{-}2 \mu\text{m}$<br>(mmol m <sup>-2</sup> ) | $\Sigma\text{BSi } 2\text{-}10 \mu\text{m}$<br>(mmol m <sup>-2</sup> ) | $\Sigma\text{BSi } >10 \mu\text{m}$<br>(mmol m <sup>-2</sup> ) | Total $\Sigma\text{BSi}$<br>(mmol m <sup>-2</sup> ) |
|----------|-------------------------------------------------------------------------|------------------------------------------------------------------------|----------------------------------------------------------------|-----------------------------------------------------|
| MAR1     | 0.36                                                                    | 3.49                                                                   | 20.28                                                          | 24.12                                               |
| NUK1     | 0.34                                                                    | 0.66                                                                   | 2.40                                                           | 3.40                                                |
| HNL1     | 0.20                                                                    | 2.34                                                                   | 5.54                                                           | 8.09                                                |
| 1        |                                                                         |                                                                        |                                                                | 3.79                                                |
| 2        |                                                                         |                                                                        |                                                                | 0.40                                                |
| 3        |                                                                         |                                                                        |                                                                | 0.48                                                |
| 4        |                                                                         |                                                                        |                                                                | 0.31                                                |
| 5        |                                                                         |                                                                        |                                                                | 0.20                                                |
| 6        |                                                                         |                                                                        |                                                                | 0.18                                                |
| 7        |                                                                         |                                                                        |                                                                | 0.20                                                |
| 8        |                                                                         |                                                                        |                                                                | 0.49                                                |
| GYR2     | 0.30                                                                    | 0.37                                                                   | 0.55                                                           | 1.23                                                |
| GYR5     | 0.13                                                                    | 0.24                                                                   | 0.39                                                           | 0.75                                                |
| 11       |                                                                         |                                                                        |                                                                | 0.42                                                |
| 12       |                                                                         |                                                                        |                                                                | 0.82                                                |
| 13       |                                                                         |                                                                        |                                                                | 0.16                                                |
| 14       |                                                                         |                                                                        |                                                                | 0.47                                                |
| 15       |                                                                         |                                                                        |                                                                | 1.03                                                |
| EGY2     | 0.29                                                                    | 0.45                                                                   | 0.87                                                           | 1.60                                                |
| EGY4     | 0.15                                                                    | 0.25                                                                   | 0.65                                                           | 1.05                                                |
| 17       |                                                                         |                                                                        |                                                                | 2.36                                                |
| 18       |                                                                         |                                                                        |                                                                | 2.47                                                |
| 19       |                                                                         |                                                                        |                                                                | 0.45                                                |
| 20       |                                                                         |                                                                        |                                                                | 1.50                                                |
| 21       |                                                                         |                                                                        |                                                                | 3.48                                                |
| UPW1*    | 1.27                                                                    | 5.36                                                                   | 55.43                                                          | 62.05                                               |
| UPW2     | 3.75                                                                    | 15.28                                                                  | 124.10                                                         | 142.81                                              |
| UPX1**   | 7.66                                                                    | 9.80                                                                   | 14.64                                                          | 32.00                                               |
| UPX2**   | 2.27                                                                    | 8.12                                                                   | 15.49                                                          | 25.88                                               |

990  
991 **Appendix 1: Integrated size-fractionated Biogenic Silica concentrations ( $\Sigma\text{BSi}$ ) in the South Eastern Pacific (BIOSOPÉ**  
992 **cruise) over 0-125 m. 0-50 m for \* and 0-100 m for \*\*.**

993

| Stations | $\Sigma\text{BSi } 0.4\text{-}3 \text{ }\mu\text{m}$<br>(mmol m <sup>-2</sup> ) | $\Sigma\text{BSi } > 3 \text{ }\mu\text{m}$<br>(mmol m <sup>-2</sup> ) | Total $\Sigma\text{BSi}$<br>(mmol m <sup>-2</sup> ) |
|----------|---------------------------------------------------------------------------------|------------------------------------------------------------------------|-----------------------------------------------------|
| 1        | 1.24                                                                            | 2.52                                                                   | 3.76                                                |
| 2        | 0.39                                                                            | 3.56                                                                   | 3.95                                                |
| 3        | 0.43                                                                            | 1.83                                                                   | 2.26                                                |
| A        | 0.26                                                                            | 1.83                                                                   | 2.09                                                |
| 4        | 1.06                                                                            | 2.24                                                                   | 3.30                                                |
| 5        | 0.51                                                                            | 3.60                                                                   | 4.11                                                |
| 6        | 0.70                                                                            | 1.80                                                                   | 2.49                                                |
| 7        | 0.39                                                                            | 1.95                                                                   | 2.34                                                |
| 8        | 0.39                                                                            | 1.12                                                                   | 1.51                                                |
| 9        | 0.50                                                                            | 1.45                                                                   | 1.96                                                |
| 10       | 0.77                                                                            | 0.98                                                                   | 1.75                                                |
| 11       | 0.24                                                                            | 1.00                                                                   | 1.24                                                |
| 12       | 0.17                                                                            | 1.29                                                                   | 1.46                                                |
| B        | 0.30                                                                            | 1.60                                                                   | 1.89                                                |
| 13       | 0.17                                                                            | 0.96                                                                   | 1.13                                                |
| C*       | 0.50                                                                            | 0.93                                                                   | 1.43                                                |
| C*       | 0.59                                                                            | 1.03                                                                   | 1.61                                                |
| 14*      | 0.68                                                                            | 1.02                                                                   | 1.70                                                |
| 15*      | 0.76                                                                            | 1.38                                                                   | 2.14                                                |

994

995 **Appendix 2: Integrated size-fractionated Biogenic Silica concentrations ( $\Sigma\text{BSi}$ ) in the South Western Pacific (OUTPACE**  
996 **cruise) over 0-125 m and 0-200 m for \*.**

997

998

| STATION                              | 1     | 2     | 3     | A     | A     | A     | A   | 4   | 5   | 6   | 7   | 8   | 9   | 10  | 11   | 12   | B    | B    | B    | B    | C    | C    | C    | C    | 14   | 15   |      |      |      |
|--------------------------------------|-------|-------|-------|-------|-------|-------|-----|-----|-----|-----|-----|-----|-----|-----|------|------|------|------|------|------|------|------|------|------|------|------|------|------|------|
| Date                                 | 22/02 | 23/02 | 24/02 | 26/02 | 27/02 | 28/02 | 1/3 | 2/3 | 4/3 | 5/3 | 6/3 | 7/3 | 8/3 | 9/3 | 10/3 | 11/3 | 12/3 | 15/3 | 16/3 | 17/3 | 18/3 | 19/3 | 23/3 | 24/3 | 25/3 | 26/3 | 27/3 | 29/3 | 30/3 |
| Diatoms                              |       |       |       |       |       |       |     |     |     |     |     |     |     |     |      |      |      |      |      |      |      |      |      |      |      |      |      |      |      |
| Asterolampra marylandica             |       |       |       |       |       |       |     |     |     |     |     |     |     |     |      |      |      |      |      |      |      |      |      |      |      |      |      |      |      |
| Asteromphalus heptactis/roperianus   |       |       |       |       |       |       |     |     |     |     |     |     |     |     |      |      |      |      |      |      |      |      |      |      |      |      |      |      |      |
| Bacillaria paxillifera               |       |       |       |       |       |       |     |     |     |     |     |     |     |     |      |      |      |      |      |      |      |      |      |      |      |      |      |      |      |
| Bacteriastrum comosum                |       |       |       |       |       |       |     |     |     |     |     |     |     |     |      |      |      |      |      |      |      |      |      |      |      |      |      |      |      |
| Bacteriastrum elongatum              |       |       |       |       |       |       |     |     |     |     |     |     |     |     |      |      |      |      |      |      |      |      |      |      |      |      |      |      |      |
| Cerataulina cf pelagica              |       |       |       |       |       |       |     |     |     |     |     |     |     |     |      |      |      |      |      |      |      |      |      |      |      |      |      |      |      |
| Chaetoceros hyalochaetae spp/        |       |       |       |       |       |       |     |     |     |     |     |     |     |     |      |      |      |      |      |      |      |      |      |      |      |      |      |      |      |
| Chaetoceros compressus with Richelia |       |       |       |       |       |       |     |     |     |     |     |     |     |     |      |      |      |      |      |      |      |      |      |      |      |      |      |      |      |
| Chaetoceros dadayi                   |       |       |       |       |       |       |     |     |     |     |     |     |     |     |      |      |      |      |      |      |      |      |      |      |      |      |      |      |      |
| Chaetoceros peruvianus               |       |       |       |       |       |       |     |     |     |     |     |     |     |     |      |      |      |      |      |      |      |      |      |      |      |      |      |      |      |
| Climacodium frauenfeldianum          |       |       |       |       |       |       |     |     |     |     |     |     |     |     |      |      |      |      |      |      |      |      |      |      |      |      |      |      |      |
| Cylindrotheca closterium             |       |       |       |       |       |       |     |     |     |     |     |     |     |     |      |      |      |      |      |      |      |      |      |      |      |      |      |      |      |
| Dactyliosolen blavyanus              |       |       |       |       |       |       |     |     |     |     |     |     |     |     |      |      |      |      |      |      |      |      |      |      |      |      |      |      |      |
| Dactyliosolen fragilissimus          |       |       |       |       |       |       |     |     |     |     |     |     |     |     |      |      |      |      |      |      |      |      |      |      |      |      |      |      |      |
| Dactyliosolen phuketensis            |       |       |       |       |       |       |     |     |     |     |     |     |     |     |      |      |      |      |      |      |      |      |      |      |      |      |      |      |      |
| Ditylum brightwelli                  |       |       |       |       |       |       |     |     |     |     |     |     |     |     |      |      |      |      |      |      |      |      |      |      |      |      |      |      |      |
| Gossleriella tropica                 |       |       |       |       |       |       |     |     |     |     |     |     |     |     |      |      |      |      |      |      |      |      |      |      |      |      |      |      |      |
| Guinardia cylindrus with Richelia    |       |       |       |       |       |       |     |     |     |     |     |     |     |     |      |      |      |      |      |      |      |      |      |      |      |      |      |      |      |
| Guinardia striata                    |       |       |       |       |       |       |     |     |     |     |     |     |     |     |      |      |      |      |      |      |      |      |      |      |      |      |      |      |      |
| Haslea sp.                           |       |       |       |       |       |       |     |     |     |     |     |     |     |     |      |      |      |      |      |      |      |      |      |      |      |      |      |      |      |
| Helicotheca tamesis                  |       |       |       |       |       |       |     |     |     |     |     |     |     |     |      |      |      |      |      |      |      |      |      |      |      |      |      |      |      |
| Hemiaulus membranaceus               |       |       |       |       |       |       |     |     |     |     |     |     |     |     |      |      |      |      |      |      |      |      |      |      |      |      |      |      |      |
| Hemiaulus hauckii                    |       |       |       |       |       |       |     |     |     |     |     |     |     |     |      |      |      |      |      |      |      |      |      |      |      |      |      |      |      |
| Hemidiscus sp.                       |       |       |       |       |       |       |     |     |     |     |     |     |     |     |      |      |      |      |      |      |      |      |      |      |      |      |      |      |      |
| Leptocylindrus mediterraneus         |       |       |       |       |       |       |     |     |     |     |     |     |     |     |      |      |      |      |      |      |      |      |      |      |      |      |      |      |      |
| Lioloma pacificum                    |       |       |       |       |       |       |     |     |     |     |     |     |     |     |      |      |      |      |      |      |      |      |      |      |      |      |      |      |      |
| Navicula/Nitzschia/Mastogloia        |       |       |       |       |       |       |     |     |     |     |     |     |     |     |      |      |      |      |      |      |      |      |      |      |      |      |      |      |      |
| Nitzschia longissima                 |       |       |       |       |       |       |     |     |     |     |     |     |     |     |      |      |      |      |      |      |      |      |      |      |      |      |      |      |      |
| Planktoniella sol                    |       |       |       |       |       |       |     |     |     |     |     |     |     |     |      |      |      |      |      |      |      |      |      |      |      |      |      |      |      |
| Proboscia alata                      |       |       |       |       |       |       |     |     |     |     |     |     |     |     |      |      |      |      |      |      |      |      |      |      |      |      |      |      |      |
| Pseudoguinardia recta                |       |       |       |       |       |       |     |     |     |     |     |     |     |     |      |      |      |      |      |      |      |      |      |      |      |      |      |      |      |
| Pseudolenia calcar-avis              |       |       |       |       |       |       |     |     |     |     |     |     |     |     |      |      |      |      |      |      |      |      |      |      |      |      |      |      |      |
| Pseudo-nitzschia                     |       |       |       |       |       |       |     |     |     |     |     |     |     |     |      |      |      |      |      |      |      |      |      |      |      |      |      |      |      |
| Rhizosolenia sp. with Richelia       |       |       |       |       |       |       |     |     |     |     |     |     |     |     |      |      |      |      |      |      |      |      |      |      |      |      |      |      |      |
| Rhizosolenia imbricata/bergonii      |       |       |       |       |       |       |     |     |     |     |     |     |     |     |      |      |      |      |      |      |      |      |      |      |      |      |      |      |      |
| Rhizosolenia formosa                 |       |       |       |       |       |       |     |     |     |     |     |     |     |     |      |      |      |      |      |      |      |      |      |      |      |      |      |      |      |
| Skeletonema sp.                      |       |       |       |       |       |       |     |     |     |     |     |     |     |     |      |      |      |      |      |      |      |      |      |      |      |      |      |      |      |
| Stephanopyxis sp.                    |       |       |       |       |       |       |     |     |     |     |     |     |     |     |      | </   |      |      |      |      |      |      |      |      |      |      |      |      |      |

**Appendix 3: Semi-quantitative contribution of siliceous plankton (diatoms, radiolarians, silicoflagellates) and diazotrophs in plankton nets hauls of 35 µm mesh size (over 0-150 m at all sites except but over 0-200 m at stations 14 and 15) during the OUTPACE cruise. Long duration stations were sampled every day. Light grey, medium grey and dark grey correspond to minor, common and dominant abundances respectively.**
