# Supplementary material for: Silicon cycle in the Tropical South Pacific: evidence for an active pico-sized siliceous plankton
Source: Copernicus journal article supplement (doi:10.5194/bg-2018-149), 2018-05-15

Figure 1

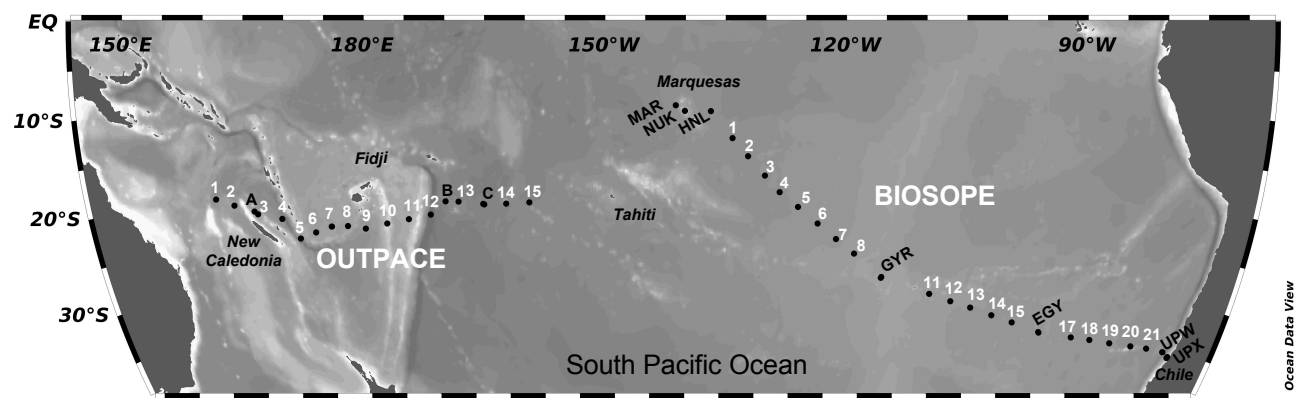

Figure 2

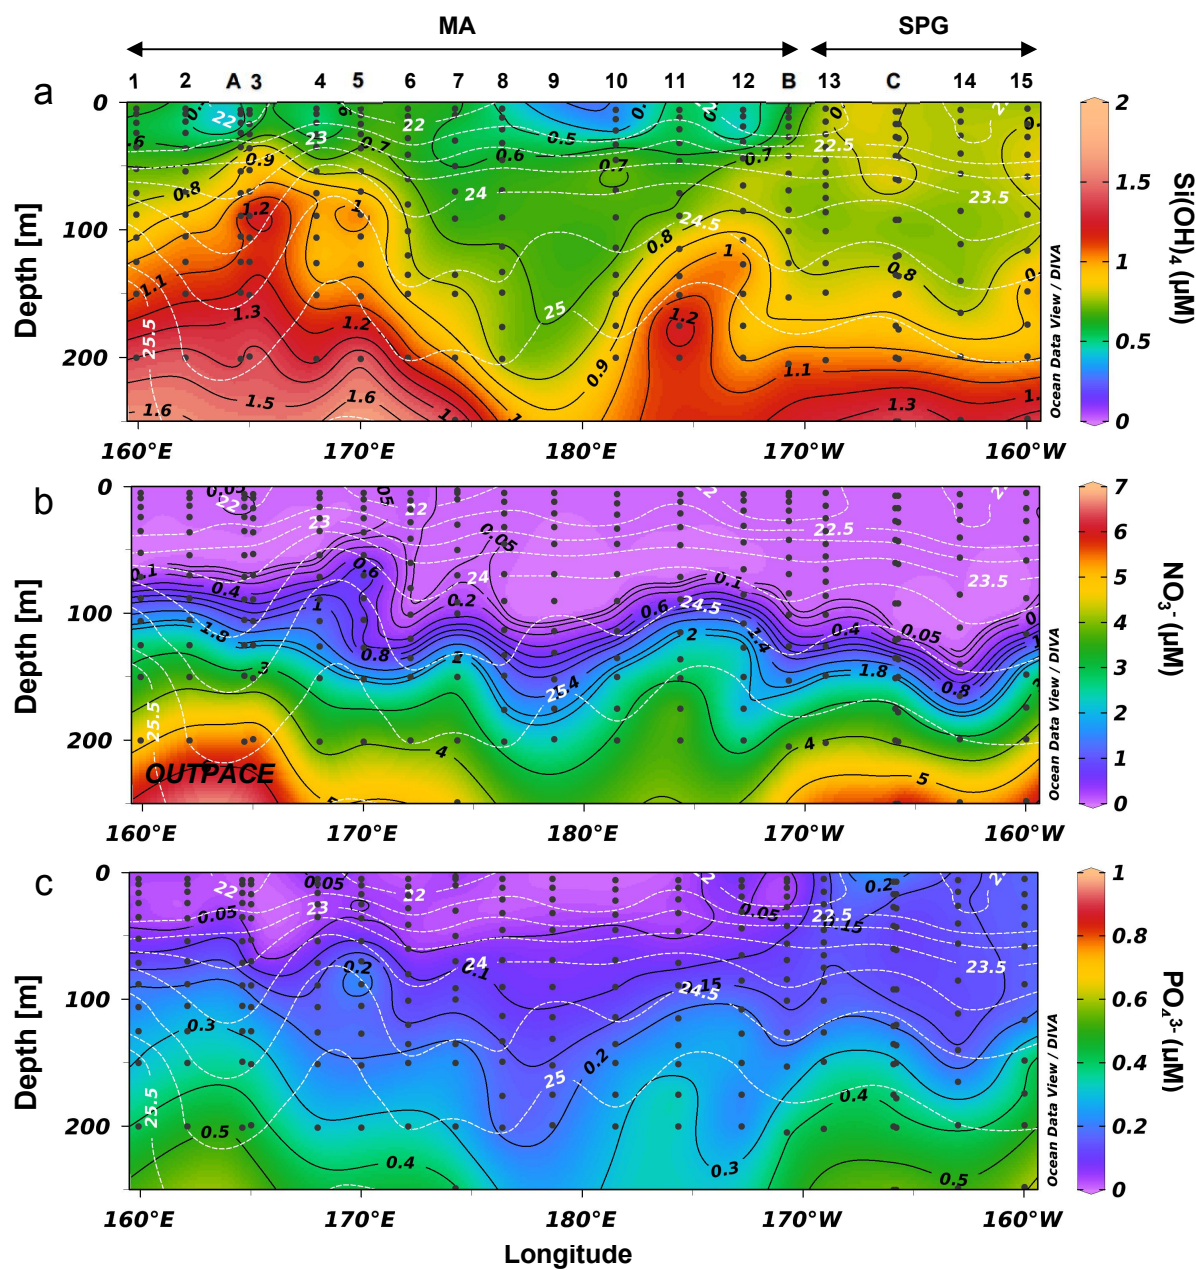

Figure 3

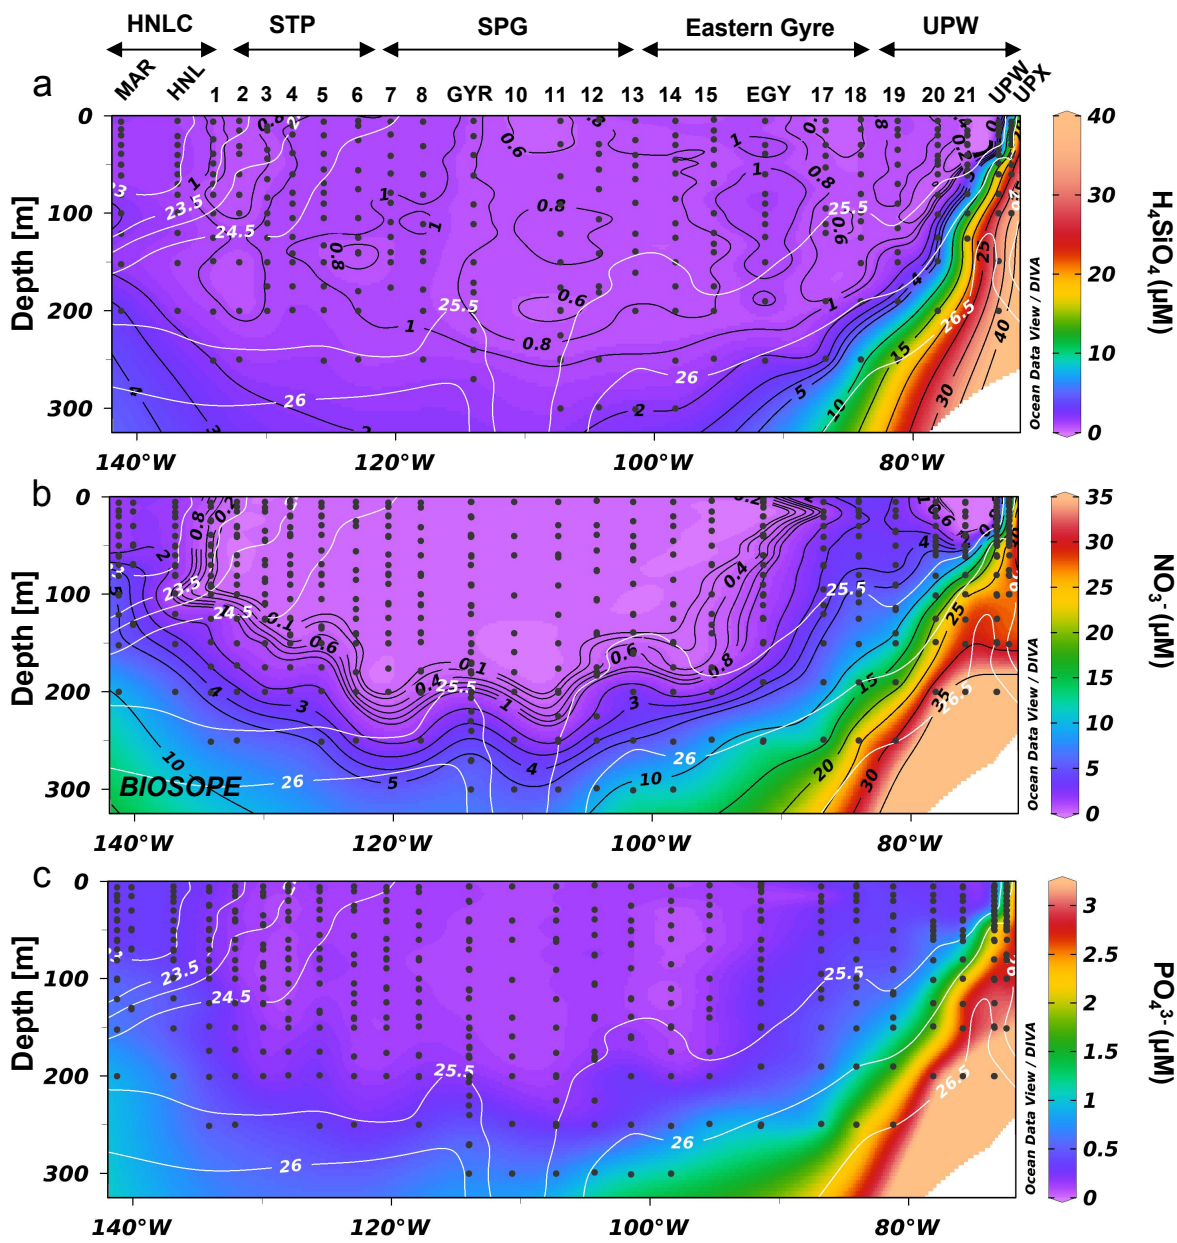

Figure 4

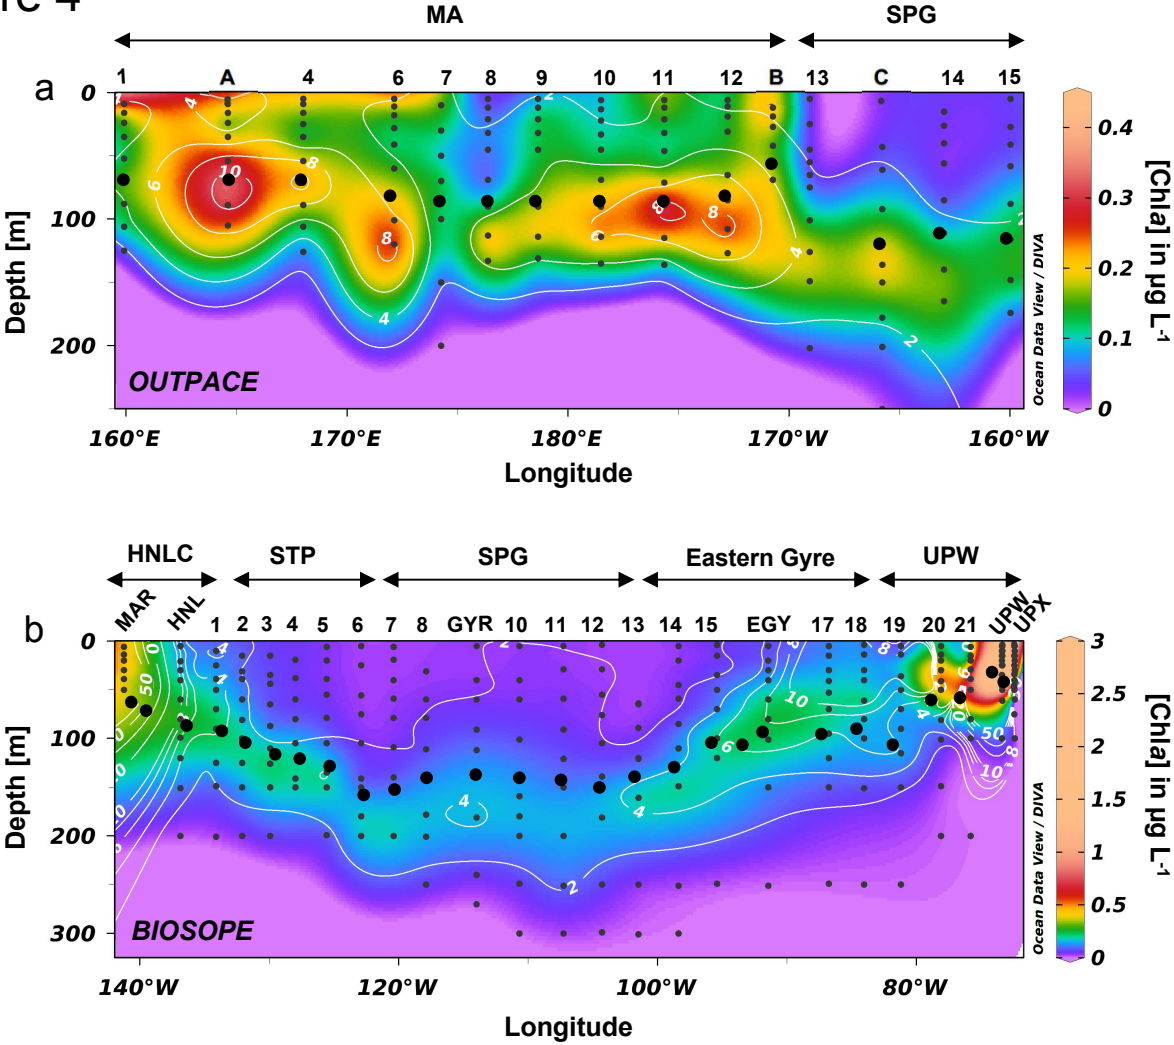



Figure 5

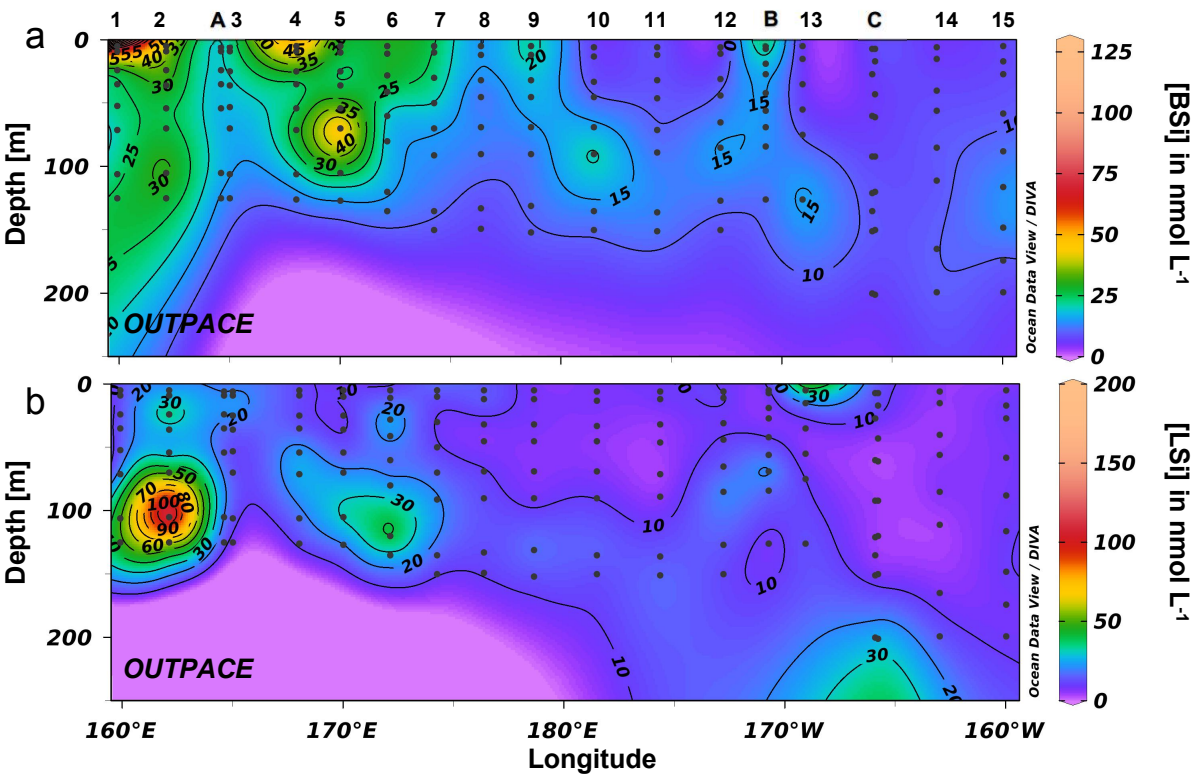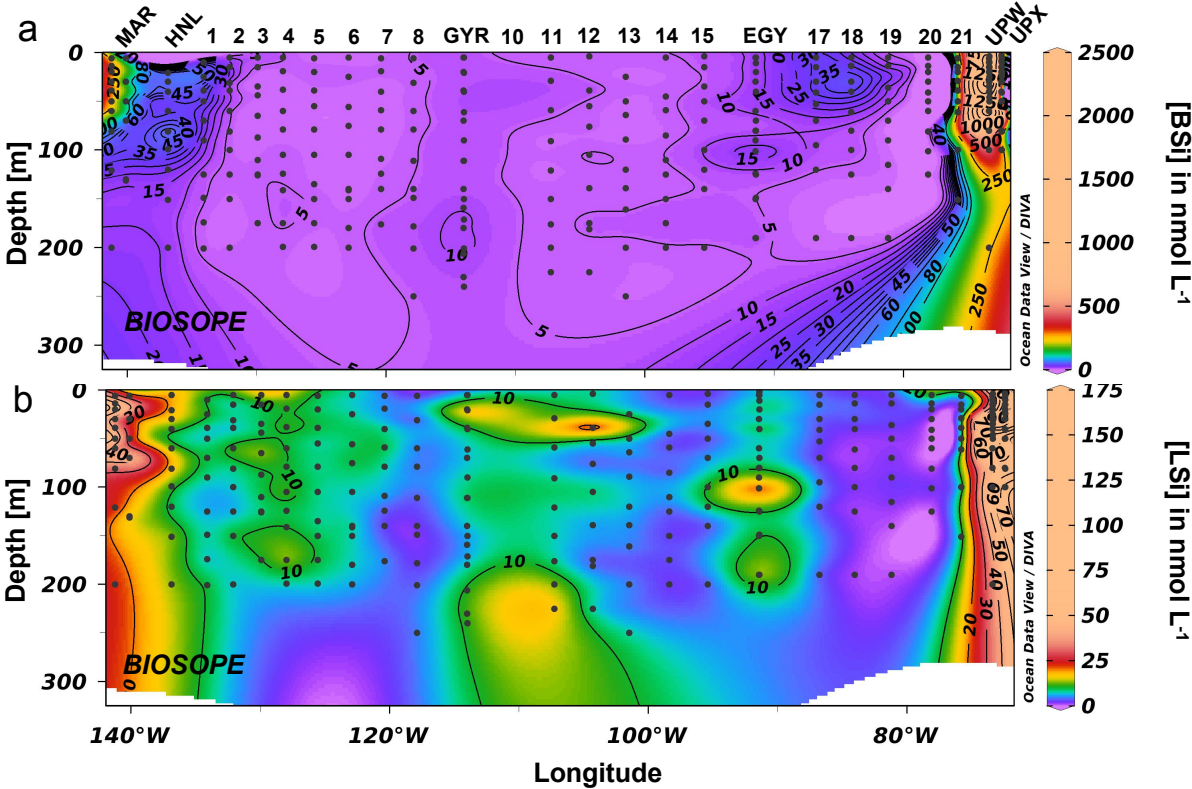

Figure 6

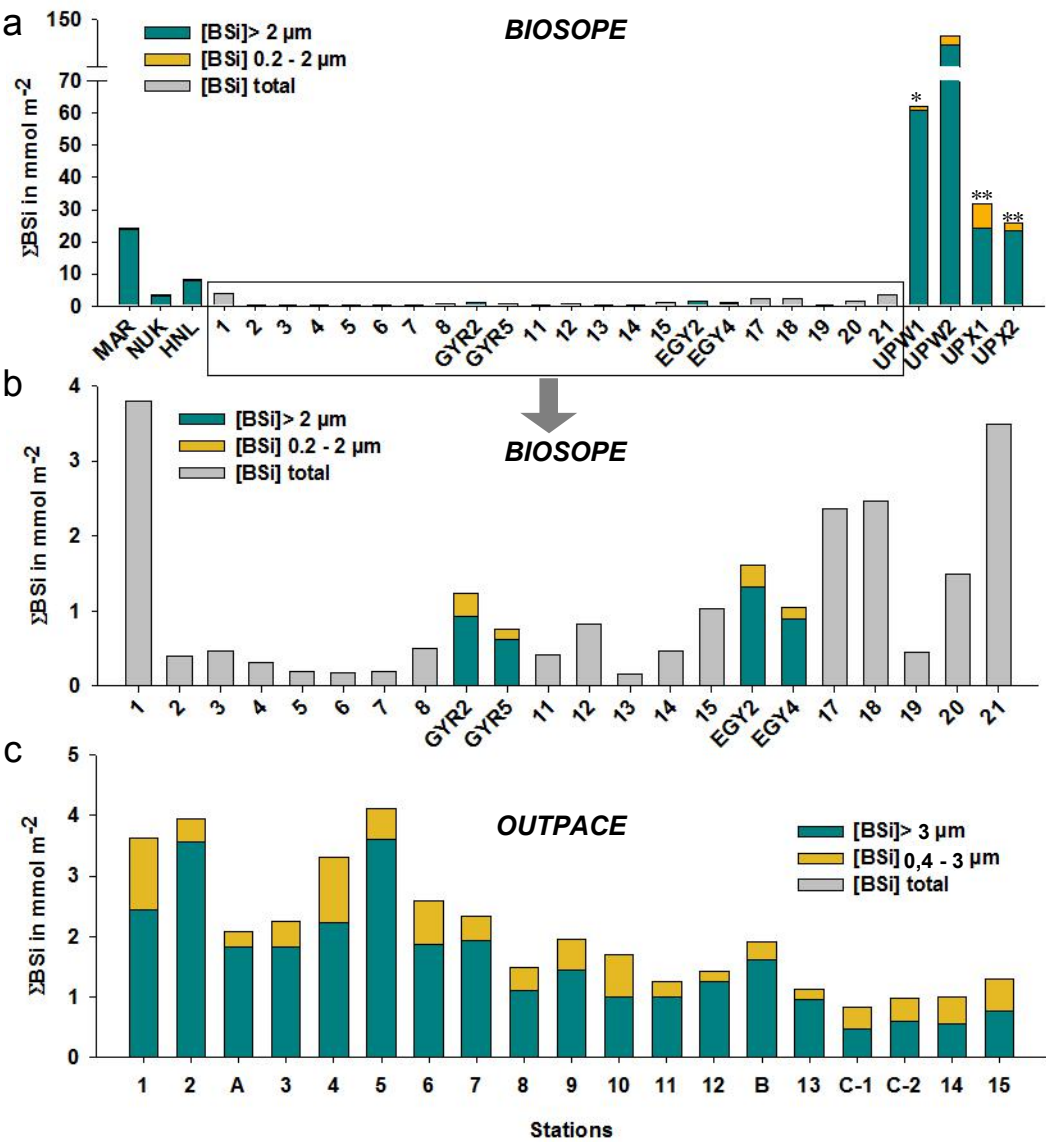

Figure 7

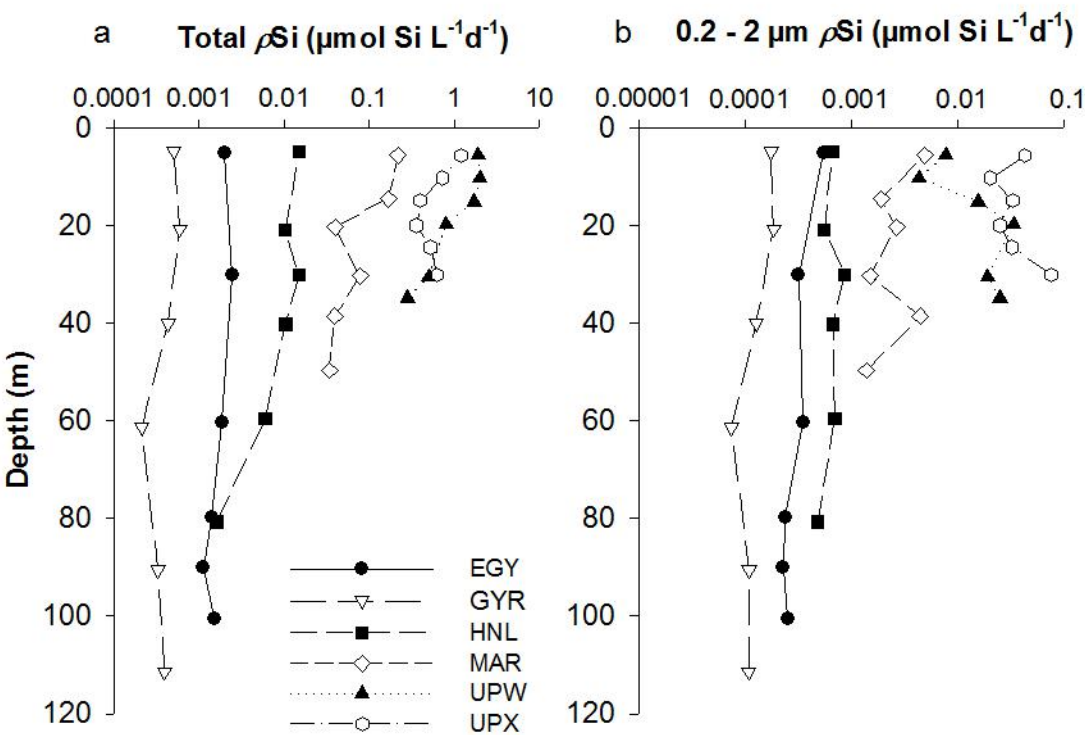

Figure 8

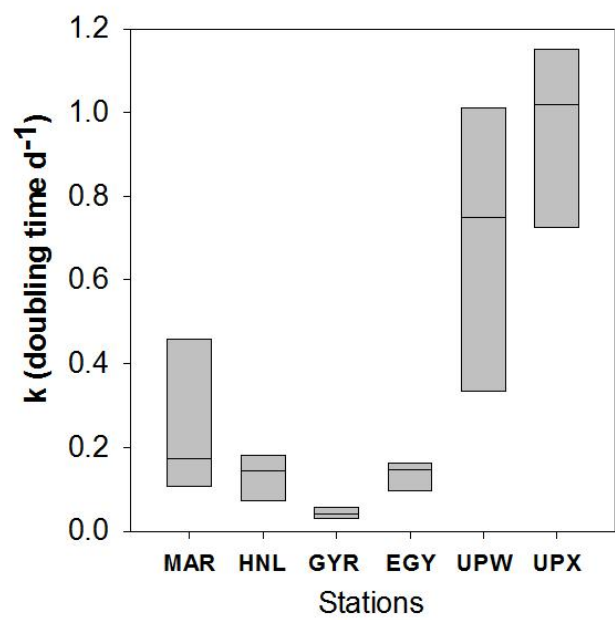



Figure 9

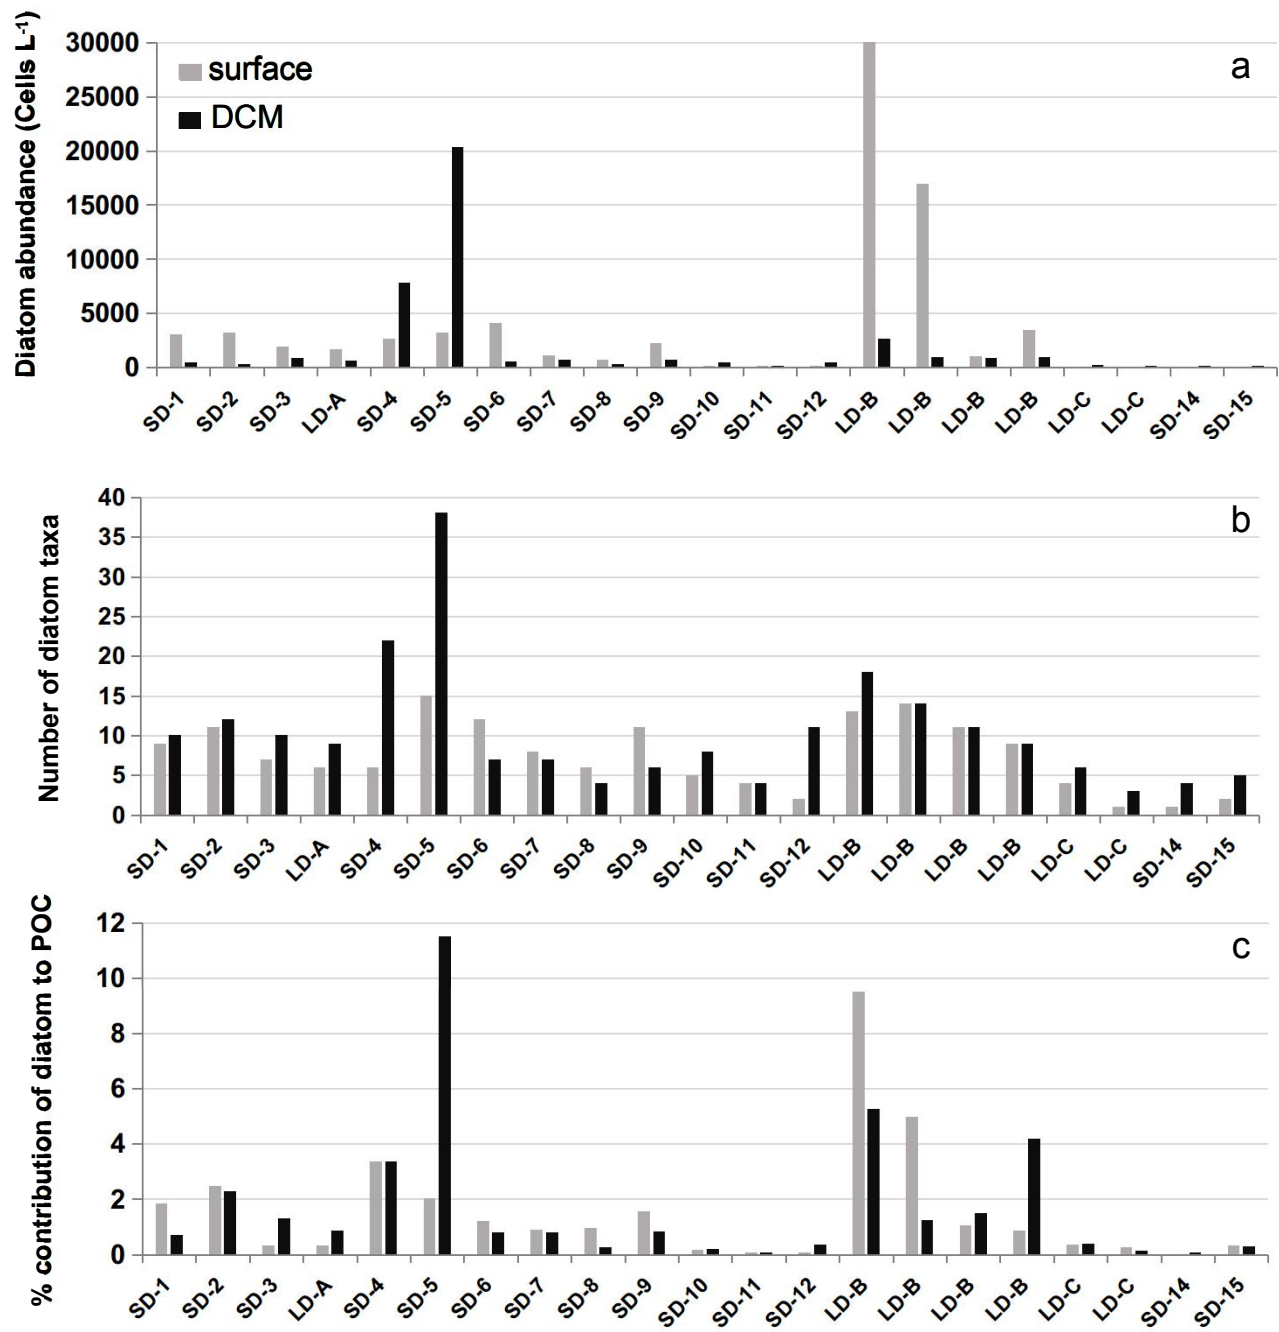

Figure 10

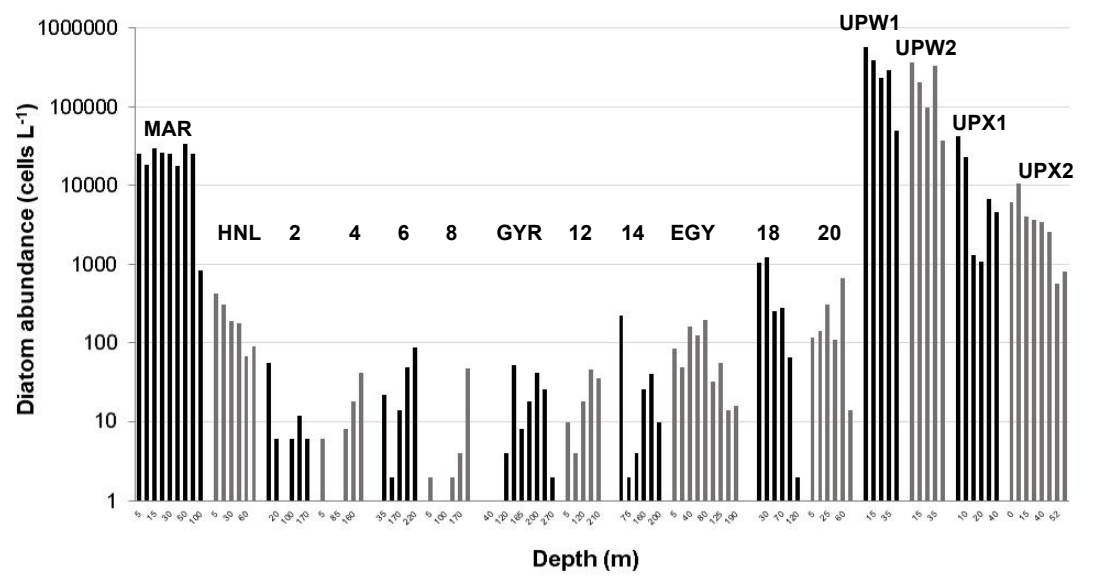

Figure 11

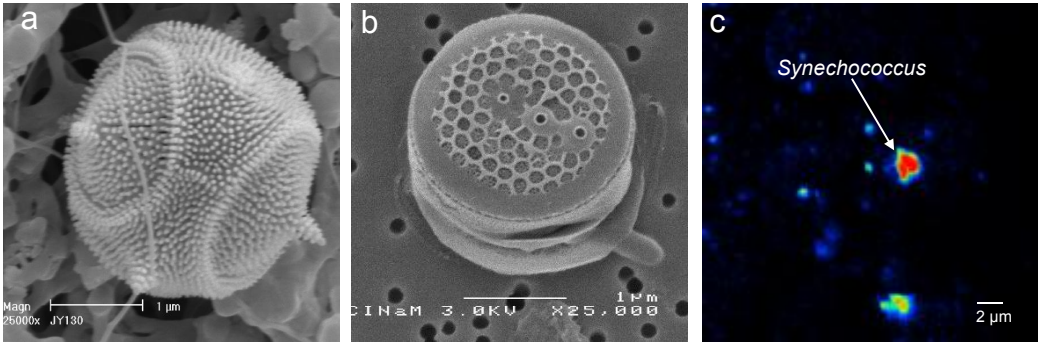

Supplement: Supplementary file [file bg-2018-149-AC4-supplement.zip]
